# Supplementary material for: Dual regulatory role of IS91-encoded Orf121 in IS91 transposition
Source: Research Square preprint supplement (doi:10.21203/rs.3.rs-7024135/v1), 2025-10-31
Supplement: Supplementary file 4 [file d666e301d1fb78caab2503d1.xlsx]

## Sheet: Fig 2c
Anova test:
Df	Sum Sq	Mean Sq	F Value	Pr(>F)	star
2	49.55	24.773	5851	<2e-16	***
15	0.06	0.004
Signif. codes: 0 ‘***’ 0.001 ‘**’ 0.01 ‘*’ 0.05 ‘.’ 0.1 ‘ ’ 1
Tukey test:
group1	group2	diff	lwr	upr	p	star
PtnpA::RBSlacZ-lacZ	Empty	2.25705	2.15947	2.35463	0	****
Porf121::RBSlacZ-lacZ	Empty	4.05524	3.95765	4.15282	0	****
Porf121::RBSlacZ-lacZ	PtnpA::RBSlacZ-lacZ	1.79819	1.70061	1.89577	0	****

## Sheet: Fig 2d
Anova test:
Df	Sum Sq	Mean Sq	F Value	Pr(>F)	star
6	15.264	2.544	338.2	<2e-16	***
35	0.263	0.0075
Signif. codes: 0 ‘***’ 0.001 ‘**’ 0.01 ‘*’ 0.05 ‘.’ 0.1 ‘ ’ 1
Tukey test:
group1	group2	diff	lwr	upr	p	star
PtnpA::lacZ Δ-1	Empty	0.979775	0.823245	1.1363	0	****
Porf121-orf121(PtnpA)::lacZ Δ-1	Empty	1.38983	1.2333	1.54636	0	****
PtnpA::lacZ	Empty	0.361492	0.204962	0.518021	4.00785e-07	****
Porf121-orf121(PtnpA)::lacZ	Empty	1.8375	1.68097	1.99403	0	****
Porf121-orf121(PtnpA*)::lacZ	Empty	1.37606	1.21953	1.53259	0	****
Porf121*-orf121(PtnpA)::lacZ	Empty	0.584235	0.427706	0.740765	2.55029e-12	****
Porf121-orf121(PtnpA)::lacZ Δ-1	PtnpA::lacZ Δ-1	0.410052	0.253522	0.566582	2.43294e-08	****
PtnpA::lacZ	PtnpA::lacZ Δ-1	-0.618283	-0.774813	-0.461754	4.0512e-13	****
Porf121-orf121(PtnpA)::lacZ	PtnpA::lacZ Δ-1	0.857722	0.701192	1.01425	0	****
Porf121-orf121(PtnpA*)::lacZ	PtnpA::lacZ Δ-1	0.396286	0.239756	0.552816	5.33048e-08	****
Porf121*-orf121(PtnpA)::lacZ	PtnpA::lacZ Δ-1	-0.39554	-0.552069	-0.23901	5.56335e-08	****
PtnpA::lacZ	Porf121-orf121(PtnpA)::lacZ Δ-1	-1.02834	-1.18487	-0.871806	0	****
Porf121-orf121(PtnpA)::lacZ	Porf121-orf121(PtnpA)::lacZ Δ-1	0.44767	0.29114	0.6042	2.98363e-09	****
Porf121-orf121(PtnpA*)::lacZ	Porf121-orf121(PtnpA)::lacZ Δ-1	-0.013766	-0.170296	0.142764	0.999959	ns
Porf121*-orf121(PtnpA)::lacZ	Porf121-orf121(PtnpA)::lacZ Δ-1	-0.805592	-0.962122	-0.649062	0	****
Porf121-orf121(PtnpA)::lacZ	PtnpA::lacZ	1.47601	1.31948	1.63254	0	****
Porf121-orf121(PtnpA*)::lacZ	PtnpA::lacZ	1.01457	0.85804	1.1711	0	****
Porf121*-orf121(PtnpA)::lacZ	PtnpA::lacZ	0.222744	0.066214	0.379273	0.00149348	**
Porf121-orf121(PtnpA*)::lacZ	Porf121-orf121(PtnpA)::lacZ	-0.461436	-0.617966	-0.304906	1.40837e-09	****
Porf121*-orf121(PtnpA)::lacZ	Porf121-orf121(PtnpA)::lacZ	-1.25326	-1.40979	-1.09673	0	****
Porf121*-orf121(PtnpA)::lacZ	Porf121-orf121(PtnpA*)::lacZ	-0.791826	-0.948356	-0.635296	0	****

## Sheet: Fig 3c
Anova test:
Df	Sum Sq	Mean Sq	F Value	Pr(>F)	star
17	507.1	29.829	121.3	<2e-16	***
136	33.4	0.246
Signif. codes: 0 ‘***’ 0.001 ‘**’ 0.01 ‘*’ 0.05 ‘.’ 0.1 ‘ ’ 1
Tukey test:
group1		group2		diff	lwr	upr	p	star
expression plasmid	IS91 derivative	expression plasmid	IS91 derivative
Plac (+IPTG)	terIS91::orf121-cmR	Plac (-IPTG)	terIS91::orf121-cmR	0.033171	-0.909667	0.976009	1	ns
Plac::tnpA (-IPTG)	terIS91::orf121-cmR	Plac (-IPTG)	terIS91::orf121-cmR	2.17374	1.2309	3.11657	2.44995e-11	****
Plac::tnpA (+IPTG)	terIS91::orf121-cmR	Plac (-IPTG)	terIS91::orf121-cmR	4.90947	3.96663	5.85231	1.06581e-14	****
Plac (-IPTG)	terIS91-cmR	Plac (-IPTG)	terIS91::orf121-cmR	0.0585295	-0.830386	0.947445	1	ns
Plac (+IPTG)	terIS91-cmR	Plac (-IPTG)	terIS91::orf121-cmR	0.088258	-0.800658	0.977174	1	ns
Plac::tnpA (-IPTG)	terIS91-cmR	Plac (-IPTG)	terIS91::orf121-cmR	3.19082	2.30191	4.07974	1.37668e-14	****
Plac::tnpA (+IPTG)	terIS91-cmR	Plac (-IPTG)	terIS91::orf121-cmR	5.02407	4.13516	5.91299	1.06581e-14	****
Plac::orf121-tnpA (-IPTG)	terIS91-cmR	Plac (-IPTG)	terIS91::orf121-cmR	1.18142	0.292502	2.07033	0.000758373	***
Plac::orf121-tnpA (+IPTG)	terIS91-cmR	Plac (-IPTG)	terIS91::orf121-cmR	1.17463	0.285713	2.06354	0.000847111	***
orf121::PLtetO-1-Plac (-aTc, -IPTG)	terIS91-cmR	Plac (-IPTG)	terIS91::orf121-cmR	0.0894805	-0.799435	0.978396	1	ns
orf121::PLtetO-1-Plac (+aTc, -IPTG)	terIS91-cmR	Plac (-IPTG)	terIS91::orf121-cmR	0.0869508	-0.801965	0.975867	1	ns
orf121::PLtetO-1-Plac (-aTc, +IPTG)	terIS91-cmR	Plac (-IPTG)	terIS91::orf121-cmR	0.151775	-0.73714	1.04069	1	ns
orf121::PLtetO-1-Plac (+aTc, +IPTG)	terIS91-cmR	Plac (-IPTG)	terIS91::orf121-cmR	0.123138	-0.765778	1.01205	1	ns
orf121::PLtetO-1-Plac::tnpA (-aTc, -IPTG)	terIS91-cmR	Plac (-IPTG)	terIS91::orf121-cmR	2.95024	2.06133	3.83916	4.19664e-14	****
orf121::PLtetO-1-Plac::tnpA (+aTc, -IPTG)	terIS91-cmR	Plac (-IPTG)	terIS91::orf121-cmR	2.59871	1.7098	3.48763	1.56097e-13	****
orf121::PLtetO-1-Plac::tnpA (-aTc, +IPTG)	terIS91-cmR	Plac (-IPTG)	terIS91::orf121-cmR	4.60729	3.71838	5.49621	1.06581e-14	****
orf121::PLtetO-1-Plac::tnpA (+aTc, +IPTG)	terIS91-cmR	Plac (-IPTG)	terIS91::orf121-cmR	3.66397	2.77505	4.55288	1.06581e-14	****
Plac::tnpA (-IPTG)	terIS91::orf121-cmR	Plac (+IPTG)	terIS91::orf121-cmR	2.14056	1.19773	3.0834	4.88782e-11	****
Plac::tnpA (+IPTG)	terIS91::orf121-cmR	Plac (+IPTG)	terIS91::orf121-cmR	4.8763	3.93346	5.81914	1.06581e-14	****
Plac (-IPTG)	terIS91-cmR	Plac (+IPTG)	terIS91::orf121-cmR	0.0253585	-0.863557	0.914274	1	ns
Plac (+IPTG)	terIS91-cmR	Plac (+IPTG)	terIS91::orf121-cmR	0.055087	-0.833829	0.944003	1	ns
Plac::tnpA (-IPTG)	terIS91-cmR	Plac (+IPTG)	terIS91::orf121-cmR	3.15765	2.26874	4.04657	1.46549e-14	****
Plac::tnpA (+IPTG)	terIS91-cmR	Plac (+IPTG)	terIS91::orf121-cmR	4.9909	4.10199	5.87982	1.06581e-14	****
Plac::orf121-tnpA (-IPTG)	terIS91-cmR	Plac (+IPTG)	terIS91::orf121-cmR	1.14825	0.259331	2.03716	0.00129546	**
Plac::orf121-tnpA (+IPTG)	terIS91-cmR	Plac (+IPTG)	terIS91::orf121-cmR	1.14146	0.252542	2.03037	0.0014431	**
orf121::PLtetO-1-Plac (-aTc, -IPTG)	terIS91-cmR	Plac (+IPTG)	terIS91::orf121-cmR	0.0563095	-0.832606	0.945225	1	ns
orf121::PLtetO-1-Plac (+aTc, -IPTG)	terIS91-cmR	Plac (+IPTG)	terIS91::orf121-cmR	0.0537798	-0.835136	0.942696	1	ns
orf121::PLtetO-1-Plac (-aTc, +IPTG)	terIS91-cmR	Plac (+IPTG)	terIS91::orf121-cmR	0.118604	-0.770311	1.00752	1	ns
orf121::PLtetO-1-Plac (+aTc, +IPTG)	terIS91-cmR	Plac (+IPTG)	terIS91::orf121-cmR	0.0899672	-0.798949	0.978883	1	ns
orf121::PLtetO-1-Plac::tnpA (-aTc, -IPTG)	terIS91-cmR	Plac (+IPTG)	terIS91::orf121-cmR	2.91707	2.02815	3.80599	4.92939e-14	****
orf121::PLtetO-1-Plac::tnpA (+aTc, -IPTG)	terIS91-cmR	Plac (+IPTG)	terIS91::orf121-cmR	2.56554	1.67662	3.45446	1.67089e-13	****
orf121::PLtetO-1-Plac::tnpA (-aTc, +IPTG)	terIS91-cmR	Plac (+IPTG)	terIS91::orf121-cmR	4.57412	3.6852	5.46304	1.06581e-14	****
orf121::PLtetO-1-Plac::tnpA (+aTc, +IPTG)	terIS91-cmR	Plac (+IPTG)	terIS91::orf121-cmR	3.6308	2.74188	4.51971	1.06581e-14	****
Plac::tnpA (+IPTG)	terIS91::orf121-cmR	Plac::tnpA (-IPTG)	terIS91::orf121-cmR	2.73573	1.7929	3.67857	1.5854e-13	****
Plac (-IPTG)	terIS91-cmR	Plac::tnpA (-IPTG)	terIS91::orf121-cmR	-2.11521	-3.00412	-1.22629	5.76794e-12	****
Plac (+IPTG)	terIS91-cmR	Plac::tnpA (-IPTG)	terIS91::orf121-cmR	-2.08548	-2.97439	-1.19656	1.10596e-11	****
Plac::tnpA (-IPTG)	terIS91-cmR	Plac::tnpA (-IPTG)	terIS91::orf121-cmR	1.01709	0.128173	1.906	0.00935064	**
Plac::tnpA (+IPTG)	terIS91-cmR	Plac::tnpA (-IPTG)	terIS91::orf121-cmR	2.85034	1.96142	3.73925	6.81677e-14	****
Plac::orf121-tnpA (-IPTG)	terIS91-cmR	Plac::tnpA (-IPTG)	terIS91::orf121-cmR	-0.992318	-1.88123	-0.103402	0.0132086	*
Plac::orf121-tnpA (+IPTG)	terIS91-cmR	Plac::tnpA (-IPTG)	terIS91::orf121-cmR	-0.999107	-1.88802	-0.110191	0.0120271	*
orf121::PLtetO-1-Plac (-aTc, -IPTG)	terIS91-cmR	Plac::tnpA (-IPTG)	terIS91::orf121-cmR	-2.08426	-2.97317	-1.19534	1.13619e-11	****
orf121::PLtetO-1-Plac (+aTc, -IPTG)	terIS91-cmR	Plac::tnpA (-IPTG)	terIS91::orf121-cmR	-2.08679	-2.9757	-1.19787	1.0746e-11	****
orf121::PLtetO-1-Plac (-aTc, +IPTG)	terIS91-cmR	Plac::tnpA (-IPTG)	terIS91::orf121-cmR	-2.02196	-2.91088	-1.13304	4.49439e-11	****
orf121::PLtetO-1-Plac (+aTc, +IPTG)	terIS91-cmR	Plac::tnpA (-IPTG)	terIS91::orf121-cmR	-2.0506	-2.93951	-1.16168	2.38681e-11	****
orf121::PLtetO-1-Plac::tnpA (-aTc, -IPTG)	terIS91-cmR	Plac::tnpA (-IPTG)	terIS91::orf121-cmR	0.776506	-0.11241	1.66542	0.168101	ns
orf121::PLtetO-1-Plac::tnpA (+aTc, -IPTG)	terIS91-cmR	Plac::tnpA (-IPTG)	terIS91::orf121-cmR	0.424976	-0.46394	1.31389	0.963354	ns
orf121::PLtetO-1-Plac::tnpA (-aTc, +IPTG)	terIS91-cmR	Plac::tnpA (-IPTG)	terIS91::orf121-cmR	2.43356	1.54464	3.32247	1.81188e-13	****
orf121::PLtetO-1-Plac::tnpA (+aTc, +IPTG)	terIS91-cmR	Plac::tnpA (-IPTG)	terIS91::orf121-cmR	1.49023	0.601315	2.37915	3.00113e-06	****
Plac (-IPTG)	terIS91-cmR	Plac::tnpA (+IPTG)	terIS91::orf121-cmR	-4.85094	-5.73986	-3.96202	1.06581e-14	****
Plac (+IPTG)	terIS91-cmR	Plac::tnpA (+IPTG)	terIS91::orf121-cmR	-4.82121	-5.71013	-3.9323	1.06581e-14	****
Plac::tnpA (-IPTG)	terIS91-cmR	Plac::tnpA (+IPTG)	terIS91::orf121-cmR	-1.71865	-2.60756	-0.82973	3.06511e-08	****
Plac::tnpA (+IPTG)	terIS91-cmR	Plac::tnpA (+IPTG)	terIS91::orf121-cmR	0.114604	-0.774312	1.00352	1	ns
Plac::orf121-tnpA (-IPTG)	terIS91-cmR	Plac::tnpA (+IPTG)	terIS91::orf121-cmR	-3.72805	-4.61697	-2.83914	1.06581e-14	****
Plac::orf121-tnpA (+IPTG)	terIS91-cmR	Plac::tnpA (+IPTG)	terIS91::orf121-cmR	-3.73484	-4.62376	-2.84593	1.06581e-14	****
orf121::PLtetO-1-Plac (-aTc, -IPTG)	terIS91-cmR	Plac::tnpA (+IPTG)	terIS91::orf121-cmR	-4.81999	-5.70891	-3.93107	1.06581e-14	****
orf121::PLtetO-1-Plac (+aTc, -IPTG)	terIS91-cmR	Plac::tnpA (+IPTG)	terIS91::orf121-cmR	-4.82252	-5.71144	-3.9336	1.06581e-14	****
orf121::PLtetO-1-Plac (-aTc, +IPTG)	terIS91-cmR	Plac::tnpA (+IPTG)	terIS91::orf121-cmR	-4.75769	-5.64661	-3.86878	1.06581e-14	****
orf121::PLtetO-1-Plac (+aTc, +IPTG)	terIS91-cmR	Plac::tnpA (+IPTG)	terIS91::orf121-cmR	-4.78633	-5.67525	-3.89742	1.06581e-14	****
orf121::PLtetO-1-Plac::tnpA (-aTc, -IPTG)	terIS91-cmR	Plac::tnpA (+IPTG)	terIS91::orf121-cmR	-1.95923	-2.84814	-1.07031	1.78636e-10	****
orf121::PLtetO-1-Plac::tnpA (+aTc, -IPTG)	terIS91-cmR	Plac::tnpA (+IPTG)	terIS91::orf121-cmR	-2.31076	-3.19967	-1.42184	2.52576e-13	****
orf121::PLtetO-1-Plac::tnpA (-aTc, +IPTG)	terIS91-cmR	Plac::tnpA (+IPTG)	terIS91::orf121-cmR	-0.302179	-1.19109	0.586737	0.99911	ns
orf121::PLtetO-1-Plac::tnpA (+aTc, +IPTG)	terIS91-cmR	Plac::tnpA (+IPTG)	terIS91::orf121-cmR	-1.2455	-2.13442	-0.356588	0.000259973	***
Plac (+IPTG)	terIS91-cmR	Plac (-IPTG)	terIS91-cmR	0.0297286	-0.801776	0.861233	1	ns
Plac::tnpA (-IPTG)	terIS91-cmR	Plac (-IPTG)	terIS91-cmR	3.1323	2.30079	3.9638	1.11022e-14	****
Plac::tnpA (+IPTG)	terIS91-cmR	Plac (-IPTG)	terIS91-cmR	4.96554	4.13404	5.79705	1.06581e-14	****
Plac::orf121-tnpA (-IPTG)	terIS91-cmR	Plac (-IPTG)	terIS91-cmR	1.12289	0.291384	1.95439	0.000554796	***
Plac::orf121-tnpA (+IPTG)	terIS91-cmR	Plac (-IPTG)	terIS91-cmR	1.1161	0.284595	1.9476	0.000625458	***
orf121::PLtetO-1-Plac (-aTc, -IPTG)	terIS91-cmR	Plac (-IPTG)	terIS91-cmR	0.030951	-0.800554	0.862456	1	ns
orf121::PLtetO-1-Plac (+aTc, -IPTG)	terIS91-cmR	Plac (-IPTG)	terIS91-cmR	0.0284213	-0.803083	0.859926	1	ns
orf121::PLtetO-1-Plac (-aTc, +IPTG)	terIS91-cmR	Plac (-IPTG)	terIS91-cmR	0.093246	-0.738259	0.924751	1	ns
orf121::PLtetO-1-Plac (+aTc, +IPTG)	terIS91-cmR	Plac (-IPTG)	terIS91-cmR	0.0646087	-0.766896	0.896113	1	ns
orf121::PLtetO-1-Plac::tnpA (-aTc, -IPTG)	terIS91-cmR	Plac (-IPTG)	terIS91-cmR	2.89171	2.06021	3.72322	1.90958e-14	****
orf121::PLtetO-1-Plac::tnpA (+aTc, -IPTG)	terIS91-cmR	Plac (-IPTG)	terIS91-cmR	2.54018	1.70868	3.37169	1.23679e-13	****
orf121::PLtetO-1-Plac::tnpA (-aTc, +IPTG)	terIS91-cmR	Plac (-IPTG)	terIS91-cmR	4.54876	3.71726	5.38027	1.06581e-14	****
orf121::PLtetO-1-Plac::tnpA (+aTc, +IPTG)	terIS91-cmR	Plac (-IPTG)	terIS91-cmR	3.60544	2.77393	4.43694	1.06581e-14	****
Plac::tnpA (-IPTG)	terIS91-cmR	Plac (+IPTG)	terIS91-cmR	3.10257	2.27106	3.93407	1.13243e-14	****
Plac::tnpA (+IPTG)	terIS91-cmR	Plac (+IPTG)	terIS91-cmR	4.93582	4.10431	5.76732	1.06581e-14	****
Plac::orf121-tnpA (-IPTG)	terIS91-cmR	Plac (+IPTG)	terIS91-cmR	1.09316	0.261655	1.92466	0.000933604	***
Plac::orf121-tnpA (+IPTG)	terIS91-cmR	Plac (+IPTG)	terIS91-cmR	1.08637	0.254866	1.91788	0.00104966	**
orf121::PLtetO-1-Plac (-aTc, -IPTG)	terIS91-cmR	Plac (+IPTG)	terIS91-cmR	0.00122246	-0.830282	0.832727	1	ns
orf121::PLtetO-1-Plac (+aTc, -IPTG)	terIS91-cmR	Plac (+IPTG)	terIS91-cmR	-0.00130724	-0.832812	0.830197	1	ns
orf121::PLtetO-1-Plac (-aTc, +IPTG)	terIS91-cmR	Plac (+IPTG)	terIS91-cmR	0.0635174	-0.767987	0.895022	1	ns
orf121::PLtetO-1-Plac (+aTc, +IPTG)	terIS91-cmR	Plac (+IPTG)	terIS91-cmR	0.0348802	-0.796624	0.866385	1	ns
orf121::PLtetO-1-Plac::tnpA (-aTc, -IPTG)	terIS91-cmR	Plac (+IPTG)	terIS91-cmR	2.86198	2.03048	3.69349	2.19824e-14	****
orf121::PLtetO-1-Plac::tnpA (+aTc, -IPTG)	terIS91-cmR	Plac (+IPTG)	terIS91-cmR	2.51045	1.67895	3.34196	1.2923e-13	****
orf121::PLtetO-1-Plac::tnpA (-aTc, +IPTG)	terIS91-cmR	Plac (+IPTG)	terIS91-cmR	4.51903	3.68753	5.35054	1.06581e-14	****
orf121::PLtetO-1-Plac::tnpA (+aTc, +IPTG)	terIS91-cmR	Plac (+IPTG)	terIS91-cmR	3.57571	2.7442	4.40721	1.06581e-14	****
Plac::tnpA (+IPTG)	terIS91-cmR	Plac::tnpA (-IPTG)	terIS91-cmR	1.83325	1.00174	2.66475	1.76319e-10	****
Plac::orf121-tnpA (-IPTG)	terIS91-cmR	Plac::tnpA (-IPTG)	terIS91-cmR	-2.00941	-2.84091	-1.1779	2.83851e-12	****
Plac::orf121-tnpA (+IPTG)	terIS91-cmR	Plac::tnpA (-IPTG)	terIS91-cmR	-2.0162	-2.8477	-1.18469	2.43217e-12	****
orf121::PLtetO-1-Plac (-aTc, -IPTG)	terIS91-cmR	Plac::tnpA (-IPTG)	terIS91-cmR	-3.10134	-3.93285	-2.26984	1.13243e-14	****
orf121::PLtetO-1-Plac (+aTc, -IPTG)	terIS91-cmR	Plac::tnpA (-IPTG)	terIS91-cmR	-3.10387	-3.93538	-2.27237	1.11022e-14	****
orf121::PLtetO-1-Plac (-aTc, +IPTG)	terIS91-cmR	Plac::tnpA (-IPTG)	terIS91-cmR	-3.03905	-3.87055	-2.20754	1.19904e-14	****
orf121::PLtetO-1-Plac (+aTc, +IPTG)	terIS91-cmR	Plac::tnpA (-IPTG)	terIS91-cmR	-3.06769	-3.89919	-2.23618	1.17684e-14	****
orf121::PLtetO-1-Plac::tnpA (-aTc, -IPTG)	terIS91-cmR	Plac::tnpA (-IPTG)	terIS91-cmR	-0.240583	-1.07209	0.590921	0.999892	ns
orf121::PLtetO-1-Plac::tnpA (+aTc, -IPTG)	terIS91-cmR	Plac::tnpA (-IPTG)	terIS91-cmR	-0.592113	-1.42362	0.239391	0.510106	ns
orf121::PLtetO-1-Plac::tnpA (-aTc, +IPTG)	terIS91-cmR	Plac::tnpA (-IPTG)	terIS91-cmR	1.41647	0.584962	2.24797	1.88407e-06	****
orf121::PLtetO-1-Plac::tnpA (+aTc, +IPTG)	terIS91-cmR	Plac::tnpA (-IPTG)	terIS91-cmR	0.473141	-0.358363	1.30465	0.852245	ns
Plac::orf121-tnpA (-IPTG)	terIS91-cmR	Plac::tnpA (+IPTG)	terIS91-cmR	-3.84266	-4.67416	-3.01115	1.06581e-14	****
Plac::orf121-tnpA (+IPTG)	terIS91-cmR	Plac::tnpA (+IPTG)	terIS91-cmR	-3.84944	-4.68095	-3.01794	1.06581e-14	****
orf121::PLtetO-1-Plac (-aTc, -IPTG)	terIS91-cmR	Plac::tnpA (+IPTG)	terIS91-cmR	-4.93459	-5.7661	-4.10309	1.06581e-14	****
orf121::PLtetO-1-Plac (+aTc, -IPTG)	terIS91-cmR	Plac::tnpA (+IPTG)	terIS91-cmR	-4.93712	-5.76863	-4.10562	1.06581e-14	****
orf121::PLtetO-1-Plac (-aTc, +IPTG)	terIS91-cmR	Plac::tnpA (+IPTG)	terIS91-cmR	-4.8723	-5.7038	-4.04079	1.06581e-14	****
orf121::PLtetO-1-Plac (+aTc, +IPTG)	terIS91-cmR	Plac::tnpA (+IPTG)	terIS91-cmR	-4.90094	-5.73244	-4.06943	1.06581e-14	****
orf121::PLtetO-1-Plac::tnpA (-aTc, -IPTG)	terIS91-cmR	Plac::tnpA (+IPTG)	terIS91-cmR	-2.07383	-2.90534	-1.24233	7.33302e-13	****
orf121::PLtetO-1-Plac::tnpA (+aTc, -IPTG)	terIS91-cmR	Plac::tnpA (+IPTG)	terIS91-cmR	-2.42536	-3.25687	-1.59386	1.61426e-13	****
orf121::PLtetO-1-Plac::tnpA (-aTc, +IPTG)	terIS91-cmR	Plac::tnpA (+IPTG)	terIS91-cmR	-0.416782	-1.24829	0.414722	0.94441	ns
orf121::PLtetO-1-Plac::tnpA (+aTc, +IPTG)	terIS91-cmR	Plac::tnpA (+IPTG)	terIS91-cmR	-1.36011	-2.19161	-0.528603	6.00173e-06	****
Plac::orf121-tnpA (+IPTG)	terIS91-cmR	Plac::orf121-tnpA (-IPTG)	terIS91-cmR	-0.0067886	-0.838293	0.824716	1	ns
orf121::PLtetO-1-Plac (-aTc, -IPTG)	terIS91-cmR	Plac::orf121-tnpA (-IPTG)	terIS91-cmR	-1.09194	-1.92344	-0.260433	0.000953556	***
orf121::PLtetO-1-Plac (+aTc, -IPTG)	terIS91-cmR	Plac::orf121-tnpA (-IPTG)	terIS91-cmR	-1.09447	-1.92597	-0.262962	0.000912709	***
orf121::PLtetO-1-Plac (-aTc, +IPTG)	terIS91-cmR	Plac::orf121-tnpA (-IPTG)	terIS91-cmR	-1.02964	-1.86115	-0.198138	0.00272351	**
orf121::PLtetO-1-Plac (+aTc, +IPTG)	terIS91-cmR	Plac::orf121-tnpA (-IPTG)	terIS91-cmR	-1.05828	-1.88978	-0.226775	0.00169291	**
orf121::PLtetO-1-Plac::tnpA (-aTc, -IPTG)	terIS91-cmR	Plac::orf121-tnpA (-IPTG)	terIS91-cmR	1.76882	0.937319	2.60033	7.90203e-10	****
orf121::PLtetO-1-Plac::tnpA (+aTc, -IPTG)	terIS91-cmR	Plac::orf121-tnpA (-IPTG)	terIS91-cmR	1.41729	0.585789	2.2488	1.85191e-06	****
orf121::PLtetO-1-Plac::tnpA (-aTc, +IPTG)	terIS91-cmR	Plac::orf121-tnpA (-IPTG)	terIS91-cmR	3.42587	2.59437	4.25738	1.06581e-14	****
orf121::PLtetO-1-Plac::tnpA (+aTc, +IPTG)	terIS91-cmR	Plac::orf121-tnpA (-IPTG)	terIS91-cmR	2.48255	1.65104	3.31405	1.46994e-13	****
orf121::PLtetO-1-Plac (-aTc, -IPTG)	terIS91-cmR	Plac::orf121-tnpA (+IPTG)	terIS91-cmR	-1.08515	-1.91665	-0.253644	0.00107197	**
orf121::PLtetO-1-Plac (+aTc, -IPTG)	terIS91-cmR	Plac::orf121-tnpA (+IPTG)	terIS91-cmR	-1.08768	-1.91918	-0.256174	0.00102629	**
orf121::PLtetO-1-Plac (-aTc, +IPTG)	terIS91-cmR	Plac::orf121-tnpA (+IPTG)	terIS91-cmR	-1.02285	-1.85436	-0.191349	0.00304295	**
orf121::PLtetO-1-Plac (+aTc, +IPTG)	terIS91-cmR	Plac::orf121-tnpA (+IPTG)	terIS91-cmR	-1.05149	-1.883	-0.219986	0.00189697	**
orf121::PLtetO-1-Plac::tnpA (-aTc, -IPTG)	terIS91-cmR	Plac::orf121-tnpA (+IPTG)	terIS91-cmR	1.77561	0.944108	2.60712	6.75279e-10	****
orf121::PLtetO-1-Plac::tnpA (+aTc, -IPTG)	terIS91-cmR	Plac::orf121-tnpA (+IPTG)	terIS91-cmR	1.42408	0.592578	2.25559	1.60762e-06	****
orf121::PLtetO-1-Plac::tnpA (-aTc, +IPTG)	terIS91-cmR	Plac::orf121-tnpA (+IPTG)	terIS91-cmR	3.43266	2.60116	4.26417	1.06581e-14	****
orf121::PLtetO-1-Plac::tnpA (+aTc, +IPTG)	terIS91-cmR	Plac::orf121-tnpA (+IPTG)	terIS91-cmR	2.48934	1.65783	3.32084	1.42331e-13	****
orf121::PLtetO-1-Plac (+aTc, -IPTG)	terIS91-cmR	orf121::PLtetO-1-Plac (-aTc, -IPTG)	terIS91-cmR	-0.0025297	-0.834034	0.828975	1	ns
orf121::PLtetO-1-Plac (-aTc, +IPTG)	terIS91-cmR	orf121::PLtetO-1-Plac (-aTc, -IPTG)	terIS91-cmR	0.062295	-0.76921	0.8938	1	ns
orf121::PLtetO-1-Plac (+aTc, +IPTG)	terIS91-cmR	orf121::PLtetO-1-Plac (-aTc, -IPTG)	terIS91-cmR	0.0336577	-0.797847	0.865162	1	ns
orf121::PLtetO-1-Plac::tnpA (-aTc, -IPTG)	terIS91-cmR	orf121::PLtetO-1-Plac (-aTc, -IPTG)	terIS91-cmR	2.86076	2.02926	3.69227	2.15383e-14	****
orf121::PLtetO-1-Plac::tnpA (+aTc, -IPTG)	terIS91-cmR	orf121::PLtetO-1-Plac (-aTc, -IPTG)	terIS91-cmR	2.50923	1.67773	3.34074	1.30007e-13	****
orf121::PLtetO-1-Plac::tnpA (-aTc, +IPTG)	terIS91-cmR	orf121::PLtetO-1-Plac (-aTc, -IPTG)	terIS91-cmR	4.51781	3.68631	5.34932	1.06581e-14	****
orf121::PLtetO-1-Plac::tnpA (+aTc, +IPTG)	terIS91-cmR	orf121::PLtetO-1-Plac (-aTc, -IPTG)	terIS91-cmR	3.57449	2.74298	4.40599	1.06581e-14	****
orf121::PLtetO-1-Plac (-aTc, +IPTG)	terIS91-cmR	orf121::PLtetO-1-Plac (+aTc, -IPTG)	terIS91-cmR	0.0648247	-0.76668	0.896329	1	ns
orf121::PLtetO-1-Plac (+aTc, +IPTG)	terIS91-cmR	orf121::PLtetO-1-Plac (+aTc, -IPTG)	terIS91-cmR	0.0361874	-0.795317	0.867692	1	ns
orf121::PLtetO-1-Plac::tnpA (-aTc, -IPTG)	terIS91-cmR	orf121::PLtetO-1-Plac (+aTc, -IPTG)	terIS91-cmR	2.86329	2.03179	3.6948	2.15383e-14	****
orf121::PLtetO-1-Plac::tnpA (+aTc, -IPTG)	terIS91-cmR	orf121::PLtetO-1-Plac (+aTc, -IPTG)	terIS91-cmR	2.51176	1.68026	3.34327	1.35558e-13	****
orf121::PLtetO-1-Plac::tnpA (-aTc, +IPTG)	terIS91-cmR	orf121::PLtetO-1-Plac (+aTc, -IPTG)	terIS91-cmR	4.52034	3.68884	5.35185	1.06581e-14	****
orf121::PLtetO-1-Plac::tnpA (+aTc, +IPTG)	terIS91-cmR	orf121::PLtetO-1-Plac (+aTc, -IPTG)	terIS91-cmR	3.57702	2.74551	4.40852	1.06581e-14	****
orf121::PLtetO-1-Plac (+aTc, +IPTG)	terIS91-cmR	orf121::PLtetO-1-Plac (-aTc, +IPTG)	terIS91-cmR	-0.0286372	-0.860142	0.802867	1	ns
orf121::PLtetO-1-Plac::tnpA (-aTc, -IPTG)	terIS91-cmR	orf121::PLtetO-1-Plac (-aTc, +IPTG)	terIS91-cmR	2.79847	1.96696	3.62997	3.10862e-14	****
orf121::PLtetO-1-Plac::tnpA (+aTc, -IPTG)	terIS91-cmR	orf121::PLtetO-1-Plac (-aTc, +IPTG)	terIS91-cmR	2.44694	1.61543	3.27844	1.57652e-13	****
orf121::PLtetO-1-Plac::tnpA (-aTc, +IPTG)	terIS91-cmR	orf121::PLtetO-1-Plac (-aTc, +IPTG)	terIS91-cmR	4.45552	3.62401	5.28702	1.06581e-14	****
orf121::PLtetO-1-Plac::tnpA (+aTc, +IPTG)	terIS91-cmR	orf121::PLtetO-1-Plac (-aTc, +IPTG)	terIS91-cmR	3.51219	2.68069	4.3437	1.06581e-14	****
orf121::PLtetO-1-Plac::tnpA (-aTc, -IPTG)	terIS91-cmR	orf121::PLtetO-1-Plac (+aTc, +IPTG)	terIS91-cmR	2.8271	1.9956	3.65861	2.88658e-14	****
orf121::PLtetO-1-Plac::tnpA (+aTc, -IPTG)	terIS91-cmR	orf121::PLtetO-1-Plac (+aTc, +IPTG)	terIS91-cmR	2.47557	1.64407	3.30708	1.45772e-13	****
orf121::PLtetO-1-Plac::tnpA (-aTc, +IPTG)	terIS91-cmR	orf121::PLtetO-1-Plac (+aTc, +IPTG)	terIS91-cmR	4.48415	3.65265	5.31566	1.06581e-14	****
orf121::PLtetO-1-Plac::tnpA (+aTc, +IPTG)	terIS91-cmR	orf121::PLtetO-1-Plac (+aTc, +IPTG)	terIS91-cmR	3.54083	2.70932	4.37233	1.06581e-14	****
orf121::PLtetO-1-Plac::tnpA (+aTc, -IPTG)	terIS91-cmR	orf121::PLtetO-1-Plac::tnpA (-aTc, -IPTG)	terIS91-cmR	-0.35153	-1.18303	0.479975	0.989021	ns
orf121::PLtetO-1-Plac::tnpA (-aTc, +IPTG)	terIS91-cmR	orf121::PLtetO-1-Plac::tnpA (-aTc, -IPTG)	terIS91-cmR	1.65705	0.825545	2.48855	1.01487e-08	****
orf121::PLtetO-1-Plac::tnpA (+aTc, +IPTG)	terIS91-cmR	orf121::PLtetO-1-Plac::tnpA (-aTc, -IPTG)	terIS91-cmR	0.713725	-0.11778	1.54523	0.190827	ns
orf121::PLtetO-1-Plac::tnpA (-aTc, +IPTG)	terIS91-cmR	orf121::PLtetO-1-Plac::tnpA (+aTc, -IPTG)	terIS91-cmR	2.00858	1.17707	2.84008	2.8918e-12	****
orf121::PLtetO-1-Plac::tnpA (+aTc, +IPTG)	terIS91-cmR	orf121::PLtetO-1-Plac::tnpA (+aTc, -IPTG)	terIS91-cmR	1.06525	0.23375	1.89676	0.00150503	**
orf121::PLtetO-1-Plac::tnpA (+aTc, +IPTG)	terIS91-cmR	orf121::PLtetO-1-Plac::tnpA (-aTc, +IPTG)	terIS91-cmR	-0.943325	-1.77483	-0.11182	0.0105582	*

## Sheet: Fig 4a
Anova test:
Df	Sum Sq	Mean Sq	F Value	Pr(>F)	star
9	48.69	5.41	671.6	<2e-16	***
50	0.4	0.008
Signif. codes: 0 ‘***’ 0.001 ‘**’ 0.01 ‘*’ 0.05 ‘.’ 0.1 ‘ ’ 1
Tukey test:
group1		group2		diff	lwr	upr	p	star
expression plasmid	IS91 derivative	expression plasmid	IS91 derivative
Plac::tnpA (+IPTG)	terIS91::orf121-cmR	Plac::tnpA (-IPTG)	terIS91::orf121-cmR	1.31397	1.14245	1.48549	0	****
Plac::tnpA (-IPTG)	terIS91-cmR	Plac::tnpA (-IPTG)	terIS91::orf121-cmR	-0.610784	-0.782306	-0.439262	0	****
Plac::tnpA (+IPTG)	terIS91-cmR	Plac::tnpA (-IPTG)	terIS91::orf121-cmR	1.59592	1.4244	1.76744	0	****
Plac::orf121-tnpA (-IPTG)	terIS91-cmR	Plac::tnpA (-IPTG)	terIS91::orf121-cmR	-0.187088	-0.35861	-0.0155661	0.0224578	*
Plac::orf121-tnpA (+IPTG)	terIS91-cmR	Plac::tnpA (-IPTG)	terIS91::orf121-cmR	0.768513	0.596991	0.940034	0	****
orf121::PLtetO-1-Plac::tnpA (-aTc, -IPTG)	terIS91-cmR	Plac::tnpA (-IPTG)	terIS91::orf121-cmR	-0.125759	-0.297281	0.0457626	0.332542	ns
orf121::PLtetO-1-Plac::tnpA (+aTc, -IPTG)	terIS91-cmR	Plac::tnpA (-IPTG)	terIS91::orf121-cmR	-0.167119	-0.33864	0.00440322	0.0619404	ns
orf121::PLtetO-1-Plac::tnpA (-aTc, +IPTG)	terIS91-cmR	Plac::tnpA (-IPTG)	terIS91::orf121-cmR	1.94783	1.77631	2.11936	0	****
orf121::PLtetO-1-Plac::tnpA (+aTc, +IPTG)	terIS91-cmR	Plac::tnpA (-IPTG)	terIS91::orf121-cmR	1.70121	1.52969	1.87273	0	****
Plac::tnpA (-IPTG)	terIS91-cmR	Plac::tnpA (+IPTG)	terIS91::orf121-cmR	-1.92475	-2.09627	-1.75323	0	****
Plac::tnpA (+IPTG)	terIS91-cmR	Plac::tnpA (+IPTG)	terIS91::orf121-cmR	0.28195	0.110429	0.453472	6.56302e-05	****
Plac::orf121-tnpA (-IPTG)	terIS91-cmR	Plac::tnpA (+IPTG)	terIS91::orf121-cmR	-1.50106	-1.67258	-1.32954	0	****
Plac::orf121-tnpA (+IPTG)	terIS91-cmR	Plac::tnpA (+IPTG)	terIS91::orf121-cmR	-0.545456	-0.716978	-0.373935	0	****
orf121::PLtetO-1-Plac::tnpA (-aTc, -IPTG)	terIS91-cmR	Plac::tnpA (+IPTG)	terIS91::orf121-cmR	-1.43973	-1.61125	-1.26821	0	****
orf121::PLtetO-1-Plac::tnpA (+aTc, -IPTG)	terIS91-cmR	Plac::tnpA (+IPTG)	terIS91::orf121-cmR	-1.48109	-1.65261	-1.30957	0	****
orf121::PLtetO-1-Plac::tnpA (-aTc, +IPTG)	terIS91-cmR	Plac::tnpA (+IPTG)	terIS91::orf121-cmR	0.633865	0.462343	0.805387	0	****
orf121::PLtetO-1-Plac::tnpA (+aTc, +IPTG)	terIS91-cmR	Plac::tnpA (+IPTG)	terIS91::orf121-cmR	0.387243	0.215721	0.558765	4.78585e-08	****
Plac::tnpA (+IPTG)	terIS91-cmR	Plac::tnpA (-IPTG)	terIS91-cmR	2.2067	2.03518	2.37823	0	****
Plac::orf121-tnpA (-IPTG)	terIS91-cmR	Plac::tnpA (-IPTG)	terIS91-cmR	0.423696	0.252174	0.595218	3.90771e-09	****
Plac::orf121-tnpA (+IPTG)	terIS91-cmR	Plac::tnpA (-IPTG)	terIS91-cmR	1.3793	1.20777	1.55082	0	****
orf121::PLtetO-1-Plac::tnpA (-aTc, -IPTG)	terIS91-cmR	Plac::tnpA (-IPTG)	terIS91-cmR	0.485025	0.313503	0.656547	5.848e-11	****
orf121::PLtetO-1-Plac::tnpA (+aTc, -IPTG)	terIS91-cmR	Plac::tnpA (-IPTG)	terIS91-cmR	0.443665	0.272144	0.615187	1.00123e-09	****
orf121::PLtetO-1-Plac::tnpA (-aTc, +IPTG)	terIS91-cmR	Plac::tnpA (-IPTG)	terIS91-cmR	2.55862	2.3871	2.73014	0	****
orf121::PLtetO-1-Plac::tnpA (+aTc, +IPTG)	terIS91-cmR	Plac::tnpA (-IPTG)	terIS91-cmR	2.312	2.14047	2.48352	0	****
Plac::orf121-tnpA (-IPTG)	terIS91-cmR	Plac::tnpA (+IPTG)	terIS91-cmR	-1.78301	-1.95453	-1.61149	0	****
Plac::orf121-tnpA (+IPTG)	terIS91-cmR	Plac::tnpA (+IPTG)	terIS91-cmR	-0.827407	-0.998929	-0.655885	0	****
orf121::PLtetO-1-Plac::tnpA (-aTc, -IPTG)	terIS91-cmR	Plac::tnpA (+IPTG)	terIS91-cmR	-1.72168	-1.8932	-1.55016	0	****
orf121::PLtetO-1-Plac::tnpA (+aTc, -IPTG)	terIS91-cmR	Plac::tnpA (+IPTG)	terIS91-cmR	-1.76304	-1.93456	-1.59152	0	****
orf121::PLtetO-1-Plac::tnpA (-aTc, +IPTG)	terIS91-cmR	Plac::tnpA (+IPTG)	terIS91-cmR	0.351914	0.180393	0.523436	5.50378e-07	****
orf121::PLtetO-1-Plac::tnpA (+aTc, +IPTG)	terIS91-cmR	Plac::tnpA (+IPTG)	terIS91-cmR	0.105292	-0.0662294	0.276814	0.581561	ns
Plac::orf121-tnpA (+IPTG)	terIS91-cmR	Plac::orf121-tnpA (-IPTG)	terIS91-cmR	0.955601	0.784079	1.12712	0	****
orf121::PLtetO-1-Plac::tnpA (-aTc, -IPTG)	terIS91-cmR	Plac::orf121-tnpA (-IPTG)	terIS91-cmR	0.0613288	-0.110193	0.232851	0.971599	ns
orf121::PLtetO-1-Plac::tnpA (+aTc, -IPTG)	terIS91-cmR	Plac::orf121-tnpA (-IPTG)	terIS91-cmR	0.0199693	-0.151552	0.191491	0.999996	ns
orf121::PLtetO-1-Plac::tnpA (-aTc, +IPTG)	terIS91-cmR	Plac::orf121-tnpA (-IPTG)	terIS91-cmR	2.13492	1.9634	2.30644	0	****
orf121::PLtetO-1-Plac::tnpA (+aTc, +IPTG)	terIS91-cmR	Plac::orf121-tnpA (-IPTG)	terIS91-cmR	1.8883	1.71678	2.05982	0	****
orf121::PLtetO-1-Plac::tnpA (-aTc, -IPTG)	terIS91-cmR	Plac::orf121-tnpA (+IPTG)	terIS91-cmR	-0.894272	-1.06579	-0.72275	0	****
orf121::PLtetO-1-Plac::tnpA (+aTc, -IPTG)	terIS91-cmR	Plac::orf121-tnpA (+IPTG)	terIS91-cmR	-0.935631	-1.10715	-0.764109	0	****
orf121::PLtetO-1-Plac::tnpA (-aTc, +IPTG)	terIS91-cmR	Plac::orf121-tnpA (+IPTG)	terIS91-cmR	1.17932	1.0078	1.35084	0	****
orf121::PLtetO-1-Plac::tnpA (+aTc, +IPTG)	terIS91-cmR	Plac::orf121-tnpA (+IPTG)	terIS91-cmR	0.932699	0.761177	1.10422	0	****
orf121::PLtetO-1-Plac::tnpA (+aTc, -IPTG)	terIS91-cmR	orf121::PLtetO-1-Plac::tnpA (-aTc, -IPTG)	terIS91-cmR	-0.0413594	-0.212881	0.130162	0.998308	ns
orf121::PLtetO-1-Plac::tnpA (-aTc, +IPTG)	terIS91-cmR	orf121::PLtetO-1-Plac::tnpA (-aTc, -IPTG)	terIS91-cmR	2.07359	1.90207	2.24511	0	****
orf121::PLtetO-1-Plac::tnpA (+aTc, +IPTG)	terIS91-cmR	orf121::PLtetO-1-Plac::tnpA (-aTc, -IPTG)	terIS91-cmR	1.82697	1.65545	1.99849	0	****
orf121::PLtetO-1-Plac::tnpA (-aTc, +IPTG)	terIS91-cmR	orf121::PLtetO-1-Plac::tnpA (+aTc, -IPTG)	terIS91-cmR	2.11495	1.94343	2.28647	0	****
orf121::PLtetO-1-Plac::tnpA (+aTc, +IPTG)	terIS91-cmR	orf121::PLtetO-1-Plac::tnpA (+aTc, -IPTG)	terIS91-cmR	1.86833	1.69681	2.03985	0	****
orf121::PLtetO-1-Plac::tnpA (+aTc, +IPTG)	terIS91-cmR	orf121::PLtetO-1-Plac::tnpA (-aTc, +IPTG)	terIS91-cmR	-0.246622	-0.418144	-0.0751001	0.000661817	***

## Sheet: Fig 4b
Anova test:
Df	Sum Sq	Mean Sq	F Value	Pr(>F)	star
7	122.9	17.558	124.2	<2e-16	***
40	5.65	0.141
Signif. codes: 0 ‘***’ 0.001 ‘**’ 0.01 ‘*’ 0.05 ‘.’ 0.1 ‘ ’ 1
Tukey test:
group1		group2		diff	lwr	upr	p	star
expression plasmid	IS91 derivative	expression plasmid	IS91 derivative
Plac::tnpA (+IPTG)	terIS91::orf121-cmR	Plac::tnpA (-IPTG)	terIS91::orf121-cmR	-0.0397929	-0.733672	0.654086	1	ns
Plac::orf121-tnpA (-IPTG)	terIS91-cmR	Plac::tnpA (-IPTG)	terIS91::orf121-cmR	-1.48594	-2.17982	-0.792062	8.23929e-07	****
Plac::orf121-tnpA (+IPTG)	terIS91-cmR	Plac::tnpA (-IPTG)	terIS91::orf121-cmR	2.69069	1.99681	3.38457	5.55112e-13	****
orf121::PLtetO-1-Plac::tnpA (-aTc, -IPTG)	terIS91-cmR	Plac::tnpA (-IPTG)	terIS91::orf121-cmR	-2.37912	-3.073	-1.68524	4.06142e-12	****
orf121::PLtetO-1-Plac::tnpA (+aTc, -IPTG)	terIS91-cmR	Plac::tnpA (-IPTG)	terIS91::orf121-cmR	-0.88015	-1.57403	-0.186271	0.00505361	**
orf121::PLtetO-1-Plac::tnpA (-aTc, +IPTG)	terIS91-cmR	Plac::tnpA (-IPTG)	terIS91::orf121-cmR	-2.84107	-3.53495	-2.14719	4.83835e-13	****
orf121::PLtetO-1-Plac::tnpA (+aTc, +IPTG)	terIS91-cmR	Plac::tnpA (-IPTG)	terIS91::orf121-cmR	-0.798225	-1.4921	-0.104346	0.0144953	*
Plac::orf121-tnpA (-IPTG)	terIS91-cmR	Plac::tnpA (+IPTG)	terIS91::orf121-cmR	-1.44615	-2.14003	-0.752269	1.48073e-06	****
Plac::orf121-tnpA (+IPTG)	terIS91-cmR	Plac::tnpA (+IPTG)	terIS91::orf121-cmR	2.73048	2.0366	3.42436	5.25135e-13	****
orf121::PLtetO-1-Plac::tnpA (-aTc, -IPTG)	terIS91-cmR	Plac::tnpA (+IPTG)	terIS91::orf121-cmR	-2.33932	-3.0332	-1.64544	6.41731e-12	****
orf121::PLtetO-1-Plac::tnpA (+aTc, -IPTG)	terIS91-cmR	Plac::tnpA (+IPTG)	terIS91::orf121-cmR	-0.840357	-1.53424	-0.146478	0.00849551	**
orf121::PLtetO-1-Plac::tnpA (-aTc, +IPTG)	terIS91-cmR	Plac::tnpA (+IPTG)	terIS91::orf121-cmR	-2.80127	-3.49515	-2.10739	4.94049e-13	****
orf121::PLtetO-1-Plac::tnpA (+aTc, +IPTG)	terIS91-cmR	Plac::tnpA (+IPTG)	terIS91::orf121-cmR	-0.758432	-1.45231	-0.064553	0.023607	*
Plac::orf121-tnpA (+IPTG)	terIS91-cmR	Plac::orf121-tnpA (-IPTG)	terIS91-cmR	4.17663	3.48275	4.87051	4.63629e-13	****
orf121::PLtetO-1-Plac::tnpA (-aTc, -IPTG)	terIS91-cmR	Plac::orf121-tnpA (-IPTG)	terIS91-cmR	-0.893175	-1.58705	-0.199296	0.00425152	**
orf121::PLtetO-1-Plac::tnpA (+aTc, -IPTG)	terIS91-cmR	Plac::orf121-tnpA (-IPTG)	terIS91-cmR	0.605792	-0.0880877	1.29967	0.126172	ns
orf121::PLtetO-1-Plac::tnpA (-aTc, +IPTG)	terIS91-cmR	Plac::orf121-tnpA (-IPTG)	terIS91-cmR	-1.35513	-2.049	-0.661246	5.67701e-06	****
orf121::PLtetO-1-Plac::tnpA (+aTc, +IPTG)	terIS91-cmR	Plac::orf121-tnpA (-IPTG)	terIS91-cmR	0.687716	-0.00616284	1.3816	0.0535561	ns
orf121::PLtetO-1-Plac::tnpA (-aTc, -IPTG)	terIS91-cmR	Plac::orf121-tnpA (+IPTG)	terIS91-cmR	-5.0698	-5.76368	-4.37592	4.63629e-13	****
orf121::PLtetO-1-Plac::tnpA (+aTc, -IPTG)	terIS91-cmR	Plac::orf121-tnpA (+IPTG)	terIS91-cmR	-3.57084	-4.26472	-2.87696	4.63851e-13	****
orf121::PLtetO-1-Plac::tnpA (-aTc, +IPTG)	terIS91-cmR	Plac::orf121-tnpA (+IPTG)	terIS91-cmR	-5.53175	-6.22563	-4.83787	4.63629e-13	****
orf121::PLtetO-1-Plac::tnpA (+aTc, +IPTG)	terIS91-cmR	Plac::orf121-tnpA (+IPTG)	terIS91-cmR	-3.48891	-4.18279	-2.79503	4.63851e-13	****
orf121::PLtetO-1-Plac::tnpA (+aTc, -IPTG)	terIS91-cmR	orf121::PLtetO-1-Plac::tnpA (-aTc, -IPTG)	terIS91-cmR	1.49897	0.805087	2.19285	6.80273e-07	****
orf121::PLtetO-1-Plac::tnpA (-aTc, +IPTG)	terIS91-cmR	orf121::PLtetO-1-Plac::tnpA (-aTc, -IPTG)	terIS91-cmR	-0.46195	-1.15583	0.231929	0.415354	ns
orf121::PLtetO-1-Plac::tnpA (+aTc, +IPTG)	terIS91-cmR	orf121::PLtetO-1-Plac::tnpA (-aTc, -IPTG)	terIS91-cmR	1.58089	0.887012	2.27477	2.04734e-07	****
orf121::PLtetO-1-Plac::tnpA (-aTc, +IPTG)	terIS91-cmR	orf121::PLtetO-1-Plac::tnpA (+aTc, -IPTG)	terIS91-cmR	-1.96092	-2.6548	-1.26704	9.12773e-10	****
orf121::PLtetO-1-Plac::tnpA (+aTc, +IPTG)	terIS91-cmR	orf121::PLtetO-1-Plac::tnpA (+aTc, -IPTG)	terIS91-cmR	0.0819248	-0.611954	0.775804	0.999939	ns
orf121::PLtetO-1-Plac::tnpA (+aTc, +IPTG)	terIS91-cmR	orf121::PLtetO-1-Plac::tnpA (-aTc, +IPTG)	terIS91-cmR	2.04284	1.34896	2.73672	2.97146e-10	****

## Sheet: Fig 4c
Anova test:
Df	Sum Sq	Mean Sq	F Value	Pr(>F)	star
17	201.63	11.86	485.7	<2e-16	***
108	2.64	0.024
Signif. codes: 0 ‘***’ 0.001 ‘**’ 0.01 ‘*’ 0.05 ‘.’ 0.1 ‘ ’ 1
Tukey test:
group1	group2	diff	lwr	upr	p	star
Plac::tnpA (+IPTG)	Plac::tnpA (-IPTG)	1.9026	1.60401	2.20119	1.15463e-14	****
Plac::tnpA6his (-IPTG)	Plac::tnpA (-IPTG)	0.246773	-0.0518185	0.545365	0.241575	ns
Plac::tnpA6his (+IPTG)	Plac::tnpA (-IPTG)	1.64263	1.34404	1.94122	1.15463e-14	****
Plac::orf121-tnpA (-IPTG)	Plac::tnpA (-IPTG)	-1.28729	-1.58588	-0.988697	1.15463e-14	****
Plac::orf121-tnpA (+IPTG)	Plac::tnpA (-IPTG)	-1.93604	-2.23464	-1.63745	1.15463e-14	****
Plac::orf121-tnpA6his (-IPTG)	Plac::tnpA (-IPTG)	-1.36111	-1.6597	-1.06251	1.15463e-14	****
Plac::orf121-tnpA6his (+IPTG)	Plac::tnpA (-IPTG)	-2.06584	-2.36443	-1.76724	1.15463e-14	****
Plac::6hisorf121-tnpA (-IPTG)	Plac::tnpA (-IPTG)	-1.35561	-1.6542	-1.05702	1.15463e-14	****
Plac::6hisorf121-tnpA (+IPTG)	Plac::tnpA (-IPTG)	-1.97719	-2.27578	-1.6786	1.15463e-14	****
orf121::PLtetO-1-Plac::tnpA (-aTc, -IPTG)	Plac::tnpA (-IPTG)	-0.181459	-0.480051	0.117133	0.766603	ns
orf121::PLtetO-1-Plac::tnpA (+aTc, -IPTG)	Plac::tnpA (-IPTG)	-0.5527	-0.851292	-0.254108	2.18527e-07	****
orf121::PLtetO-1-Plac::tnpA (-aTc, +IPTG)	Plac::tnpA (-IPTG)	1.46695	1.16836	1.76554	1.15463e-14	****
orf121::PLtetO-1-Plac::tnpA (+aTc, +IPTG)	Plac::tnpA (-IPTG)	0.541545	0.242953	0.840136	4.13207e-07	****
orf1216his::PLtetO-1-Plac::tnpA6his (-aTc, -IPTG)	Plac::tnpA (-IPTG)	-0.230688	-0.52928	0.0679037	0.352664	ns
orf1216his::PLtetO-1-Plac::tnpA6his (+aTc, -IPTG)	Plac::tnpA (-IPTG)	-0.448275	-0.746867	-0.149683	6.57691e-05	****
orf1216his::PLtetO-1-Plac::tnpA6his (-aTc, +IPTG)	Plac::tnpA (-IPTG)	1.57716	1.27857	1.87576	1.15463e-14	****
orf1216his::PLtetO-1-Plac::tnpA6his (+aTc, +IPTG)	Plac::tnpA (-IPTG)	0.545227	0.246635	0.843818	3.35057e-07	****
Plac::tnpA6his (-IPTG)	Plac::tnpA (+IPTG)	-1.65582	-1.95442	-1.35723	1.15463e-14	****
Plac::tnpA6his (+IPTG)	Plac::tnpA (+IPTG)	-0.25997	-0.558562	0.0386221	0.169862	ns
Plac::orf121-tnpA (-IPTG)	Plac::tnpA (+IPTG)	-3.18989	-3.48848	-2.8913	1.15463e-14	****
Plac::orf121-tnpA (+IPTG)	Plac::tnpA (+IPTG)	-3.83864	-4.13723	-3.54005	1.15463e-14	****
Plac::orf121-tnpA6his (-IPTG)	Plac::tnpA (+IPTG)	-3.2637	-3.5623	-2.96511	1.15463e-14	****
Plac::orf121-tnpA6his (+IPTG)	Plac::tnpA (+IPTG)	-3.96843	-4.26703	-3.66984	1.15463e-14	****
Plac::6hisorf121-tnpA (-IPTG)	Plac::tnpA (+IPTG)	-3.25821	-3.5568	-2.95961	1.15463e-14	****
Plac::6hisorf121-tnpA (+IPTG)	Plac::tnpA (+IPTG)	-3.87978	-4.17838	-3.58119	1.15463e-14	****
orf121::PLtetO-1-Plac::tnpA (-aTc, -IPTG)	Plac::tnpA (+IPTG)	-2.08406	-2.38265	-1.78547	1.15463e-14	****
orf121::PLtetO-1-Plac::tnpA (+aTc, -IPTG)	Plac::tnpA (+IPTG)	-2.4553	-2.75389	-2.15671	1.15463e-14	****
orf121::PLtetO-1-Plac::tnpA (-aTc, +IPTG)	Plac::tnpA (+IPTG)	-0.435646	-0.734238	-0.137054	0.000125203	***
orf121::PLtetO-1-Plac::tnpA (+aTc, +IPTG)	Plac::tnpA (+IPTG)	-1.36105	-1.65965	-1.06246	1.15463e-14	****
orf1216his::PLtetO-1-Plac::tnpA6his (-aTc, -IPTG)	Plac::tnpA (+IPTG)	-2.13329	-2.43188	-1.83469	1.15463e-14	****
orf1216his::PLtetO-1-Plac::tnpA6his (+aTc, -IPTG)	Plac::tnpA (+IPTG)	-2.35087	-2.64947	-2.05228	1.15463e-14	****
orf1216his::PLtetO-1-Plac::tnpA6his (-aTc, +IPTG)	Plac::tnpA (+IPTG)	-0.325434	-0.624026	-0.0268418	0.0184805	*
orf1216his::PLtetO-1-Plac::tnpA6his (+aTc, +IPTG)	Plac::tnpA (+IPTG)	-1.35737	-1.65596	-1.05878	1.15463e-14	****
Plac::tnpA6his (+IPTG)	Plac::tnpA6his (-IPTG)	1.39585	1.09726	1.69445	1.15463e-14	****
Plac::orf121-tnpA (-IPTG)	Plac::tnpA6his (-IPTG)	-1.53406	-1.83265	-1.23547	1.15463e-14	****
Plac::orf121-tnpA (+IPTG)	Plac::tnpA6his (-IPTG)	-2.18282	-2.48141	-1.88423	1.15463e-14	****
Plac::orf121-tnpA6his (-IPTG)	Plac::tnpA6his (-IPTG)	-1.60788	-1.90647	-1.30929	1.15463e-14	****
Plac::orf121-tnpA6his (+IPTG)	Plac::tnpA6his (-IPTG)	-2.31261	-2.6112	-2.01402	1.15463e-14	****
Plac::6hisorf121-tnpA (-IPTG)	Plac::tnpA6his (-IPTG)	-1.60238	-1.90097	-1.30379	1.15463e-14	****
Plac::6hisorf121-tnpA (+IPTG)	Plac::tnpA6his (-IPTG)	-2.22396	-2.52255	-1.92537	1.15463e-14	****
orf121::PLtetO-1-Plac::tnpA (-aTc, -IPTG)	Plac::tnpA6his (-IPTG)	-0.428232	-0.726824	-0.129641	0.00018166	***
orf121::PLtetO-1-Plac::tnpA (+aTc, -IPTG)	Plac::tnpA6his (-IPTG)	-0.799473	-1.09807	-0.500882	2.45581e-13	****
orf121::PLtetO-1-Plac::tnpA (-aTc, +IPTG)	Plac::tnpA6his (-IPTG)	1.22018	0.921587	1.51877	1.16573e-14	****
orf121::PLtetO-1-Plac::tnpA (+aTc, +IPTG)	Plac::tnpA6his (-IPTG)	0.294771	-0.00382059	0.593363	0.0570913	ns
orf1216his::PLtetO-1-Plac::tnpA6his (-aTc, -IPTG)	Plac::tnpA6his (-IPTG)	-0.477462	-0.776053	-0.17887	1.42292e-05	****
orf1216his::PLtetO-1-Plac::tnpA6his (+aTc, -IPTG)	Plac::tnpA6his (-IPTG)	-0.695049	-0.993641	-0.396457	4.4546e-11	****
orf1216his::PLtetO-1-Plac::tnpA6his (-aTc, +IPTG)	Plac::tnpA6his (-IPTG)	1.33039	1.0318	1.62898	1.15463e-14	****
orf1216his::PLtetO-1-Plac::tnpA6his (+aTc, +IPTG)	Plac::tnpA6his (-IPTG)	0.298453	-0.000138689	0.597045	0.0502434	ns
Plac::orf121-tnpA (-IPTG)	Plac::tnpA6his (+IPTG)	-2.92992	-3.22851	-2.63133	1.15463e-14	****
Plac::orf121-tnpA (+IPTG)	Plac::tnpA6his (+IPTG)	-3.57867	-3.87726	-3.28008	1.15463e-14	****
Plac::orf121-tnpA6his (-IPTG)	Plac::tnpA6his (+IPTG)	-3.00373	-3.30233	-2.70514	1.15463e-14	****
Plac::orf121-tnpA6his (+IPTG)	Plac::tnpA6his (+IPTG)	-3.70846	-4.00706	-3.40987	1.15463e-14	****
Plac::6hisorf121-tnpA (-IPTG)	Plac::tnpA6his (+IPTG)	-2.99824	-3.29683	-2.69964	1.15463e-14	****
Plac::6hisorf121-tnpA (+IPTG)	Plac::tnpA6his (+IPTG)	-3.61982	-3.91841	-3.32122	1.15463e-14	****
orf121::PLtetO-1-Plac::tnpA (-aTc, -IPTG)	Plac::tnpA6his (+IPTG)	-1.82409	-2.12268	-1.5255	1.15463e-14	****
orf121::PLtetO-1-Plac::tnpA (+aTc, -IPTG)	Plac::tnpA6his (+IPTG)	-2.19533	-2.49392	-1.89674	1.15463e-14	****
orf121::PLtetO-1-Plac::tnpA (-aTc, +IPTG)	Plac::tnpA6his (+IPTG)	-0.175676	-0.474268	0.122916	0.808232	ns
orf121::PLtetO-1-Plac::tnpA (+aTc, +IPTG)	Plac::tnpA6his (+IPTG)	-1.10108	-1.39968	-0.802492	1.35447e-14	****
orf1216his::PLtetO-1-Plac::tnpA6his (-aTc, -IPTG)	Plac::tnpA6his (+IPTG)	-1.87332	-2.17191	-1.57472	1.15463e-14	****
orf1216his::PLtetO-1-Plac::tnpA6his (+aTc, -IPTG)	Plac::tnpA6his (+IPTG)	-2.0909	-2.3895	-1.79231	1.15463e-14	****
orf1216his::PLtetO-1-Plac::tnpA6his (-aTc, +IPTG)	Plac::tnpA6his (+IPTG)	-0.0654639	-0.364056	0.233128	0.999998	ns
orf1216his::PLtetO-1-Plac::tnpA6his (+aTc, +IPTG)	Plac::tnpA6his (+IPTG)	-1.0974	-1.39599	-0.79881	1.36557e-14	****
Plac::orf121-tnpA (+IPTG)	Plac::orf121-tnpA (-IPTG)	-0.648755	-0.947347	-0.350163	7.49108e-10	****
Plac::orf121-tnpA6his (-IPTG)	Plac::orf121-tnpA (-IPTG)	-0.073816	-0.372408	0.224776	0.999986	ns
Plac::orf121-tnpA6his (+IPTG)	Plac::orf121-tnpA (-IPTG)	-0.778547	-1.07714	-0.479955	4.26104e-13	****
Plac::6hisorf121-tnpA (-IPTG)	Plac::orf121-tnpA (-IPTG)	-0.0683189	-0.366911	0.230273	0.999996	ns
Plac::6hisorf121-tnpA (+IPTG)	Plac::orf121-tnpA (-IPTG)	-0.689898	-0.98849	-0.391306	6.10755e-11	****
orf121::PLtetO-1-Plac::tnpA (-aTc, -IPTG)	Plac::orf121-tnpA (-IPTG)	1.10583	0.807238	1.40442	1.34337e-14	****
orf121::PLtetO-1-Plac::tnpA (+aTc, -IPTG)	Plac::orf121-tnpA (-IPTG)	0.734589	0.435997	1.03318	4.03799e-12	****
orf121::PLtetO-1-Plac::tnpA (-aTc, +IPTG)	Plac::orf121-tnpA (-IPTG)	2.75424	2.45565	3.05283	1.15463e-14	****
orf121::PLtetO-1-Plac::tnpA (+aTc, +IPTG)	Plac::orf121-tnpA (-IPTG)	1.82883	1.53024	2.12743	1.15463e-14	****
orf1216his::PLtetO-1-Plac::tnpA6his (-aTc, -IPTG)	Plac::orf121-tnpA (-IPTG)	1.0566	0.758009	1.35519	1.82077e-14	****
orf1216his::PLtetO-1-Plac::tnpA6his (+aTc, -IPTG)	Plac::orf121-tnpA (-IPTG)	0.839014	0.540422	1.13761	1.79523e-13	****
orf1216his::PLtetO-1-Plac::tnpA6his (-aTc, +IPTG)	Plac::orf121-tnpA (-IPTG)	2.86445	2.56586	3.16305	1.15463e-14	****
orf1216his::PLtetO-1-Plac::tnpA6his (+aTc, +IPTG)	Plac::orf121-tnpA (-IPTG)	1.83252	1.53392	2.13111	1.15463e-14	****
Plac::orf121-tnpA6his (-IPTG)	Plac::orf121-tnpA (+IPTG)	0.574939	0.276347	0.873531	6.04202e-08	****
Plac::orf121-tnpA6his (+IPTG)	Plac::orf121-tnpA (+IPTG)	-0.129792	-0.428384	0.1688	0.984099	ns
Plac::6hisorf121-tnpA (-IPTG)	Plac::orf121-tnpA (+IPTG)	0.580436	0.281844	0.879028	4.38402e-08	****
Plac::6hisorf121-tnpA (+IPTG)	Plac::orf121-tnpA (+IPTG)	-0.0411428	-0.339735	0.257449	1	ns
orf121::PLtetO-1-Plac::tnpA (-aTc, -IPTG)	Plac::orf121-tnpA (+IPTG)	1.75459	1.45599	2.05318	1.15463e-14	****
orf121::PLtetO-1-Plac::tnpA (+aTc, -IPTG)	Plac::orf121-tnpA (+IPTG)	1.38334	1.08475	1.68194	1.15463e-14	****
orf121::PLtetO-1-Plac::tnpA (-aTc, +IPTG)	Plac::orf121-tnpA (+IPTG)	3.403	3.1044	3.70159	1.15463e-14	****
orf121::PLtetO-1-Plac::tnpA (+aTc, +IPTG)	Plac::orf121-tnpA (+IPTG)	2.47759	2.179	2.77618	1.15463e-14	****
orf1216his::PLtetO-1-Plac::tnpA6his (-aTc, -IPTG)	Plac::orf121-tnpA (+IPTG)	1.70536	1.40676	2.00395	1.15463e-14	****
orf1216his::PLtetO-1-Plac::tnpA6his (+aTc, -IPTG)	Plac::orf121-tnpA (+IPTG)	1.48777	1.18918	1.78636	1.15463e-14	****
orf1216his::PLtetO-1-Plac::tnpA6his (-aTc, +IPTG)	Plac::orf121-tnpA (+IPTG)	3.51321	3.21462	3.8118	1.15463e-14	****
orf1216his::PLtetO-1-Plac::tnpA6his (+aTc, +IPTG)	Plac::orf121-tnpA (+IPTG)	2.48127	2.18268	2.77986	1.15463e-14	****
Plac::orf121-tnpA6his (+IPTG)	Plac::orf121-tnpA6his (-IPTG)	-0.704731	-1.00332	-0.406139	2.46269e-11	****
Plac::6hisorf121-tnpA (-IPTG)	Plac::orf121-tnpA6his (-IPTG)	0.00549709	-0.293095	0.304089	1	ns
Plac::6hisorf121-tnpA (+IPTG)	Plac::orf121-tnpA6his (-IPTG)	-0.616082	-0.914673	-0.31749	5.33824e-09	****
orf121::PLtetO-1-Plac::tnpA (-aTc, -IPTG)	Plac::orf121-tnpA6his (-IPTG)	1.17965	0.881054	1.47824	1.17684e-14	****
orf121::PLtetO-1-Plac::tnpA (+aTc, -IPTG)	Plac::orf121-tnpA6his (-IPTG)	0.808405	0.509813	1.107	2.14717e-13	****
orf121::PLtetO-1-Plac::tnpA (-aTc, +IPTG)	Plac::orf121-tnpA6his (-IPTG)	2.82806	2.52947	3.12665	1.15463e-14	****
orf121::PLtetO-1-Plac::tnpA (+aTc, +IPTG)	Plac::orf121-tnpA6his (-IPTG)	1.90265	1.60406	2.20124	1.15463e-14	****
orf1216his::PLtetO-1-Plac::tnpA6his (-aTc, -IPTG)	Plac::orf121-tnpA6his (-IPTG)	1.13042	0.831825	1.42901	1.23235e-14	****
orf1216his::PLtetO-1-Plac::tnpA6his (+aTc, -IPTG)	Plac::orf121-tnpA6his (-IPTG)	0.91283	0.614238	1.21142	1.12355e-13	****
orf1216his::PLtetO-1-Plac::tnpA6his (-aTc, +IPTG)	Plac::orf121-tnpA6his (-IPTG)	2.93827	2.63968	3.23686	1.15463e-14	****
orf1216his::PLtetO-1-Plac::tnpA6his (+aTc, +IPTG)	Plac::orf121-tnpA6his (-IPTG)	1.90633	1.60774	2.20492	1.15463e-14	****
Plac::6hisorf121-tnpA (-IPTG)	Plac::orf121-tnpA6his (+IPTG)	0.710228	0.411636	1.00882	1.75971e-11	****
Plac::6hisorf121-tnpA (+IPTG)	Plac::orf121-tnpA6his (+IPTG)	0.0886492	-0.209943	0.387241	0.999825	ns
orf121::PLtetO-1-Plac::tnpA (-aTc, -IPTG)	Plac::orf121-tnpA6his (+IPTG)	1.88438	1.58579	2.18297	1.15463e-14	****
orf121::PLtetO-1-Plac::tnpA (+aTc, -IPTG)	Plac::orf121-tnpA6his (+IPTG)	1.51314	1.21454	1.81173	1.15463e-14	****
orf121::PLtetO-1-Plac::tnpA (-aTc, +IPTG)	Plac::orf121-tnpA6his (+IPTG)	3.53279	3.2342	3.83138	1.15463e-14	****
orf121::PLtetO-1-Plac::tnpA (+aTc, +IPTG)	Plac::orf121-tnpA6his (+IPTG)	2.60738	2.30879	2.90597	1.15463e-14	****
orf1216his::PLtetO-1-Plac::tnpA6his (-aTc, -IPTG)	Plac::orf121-tnpA6his (+IPTG)	1.83515	1.53656	2.13374	1.15463e-14	****
orf1216his::PLtetO-1-Plac::tnpA6his (+aTc, -IPTG)	Plac::orf121-tnpA6his (+IPTG)	1.61756	1.31897	1.91615	1.15463e-14	****
orf1216his::PLtetO-1-Plac::tnpA6his (-aTc, +IPTG)	Plac::orf121-tnpA6his (+IPTG)	3.643	3.34441	3.94159	1.15463e-14	****
orf1216his::PLtetO-1-Plac::tnpA6his (+aTc, +IPTG)	Plac::orf121-tnpA6his (+IPTG)	2.61106	2.31247	2.90965	1.15463e-14	****
Plac::6hisorf121-tnpA (+IPTG)	Plac::6hisorf121-tnpA (-IPTG)	-0.621579	-0.920171	-0.322987	3.84419e-09	****
orf121::PLtetO-1-Plac::tnpA (-aTc, -IPTG)	Plac::6hisorf121-tnpA (-IPTG)	1.17415	0.875557	1.47274	1.17684e-14	****
orf121::PLtetO-1-Plac::tnpA (+aTc, -IPTG)	Plac::6hisorf121-tnpA (-IPTG)	0.802908	0.504316	1.1015	2.36811e-13	****
orf121::PLtetO-1-Plac::tnpA (-aTc, +IPTG)	Plac::6hisorf121-tnpA (-IPTG)	2.82256	2.52397	3.12115	1.15463e-14	****
orf121::PLtetO-1-Plac::tnpA (+aTc, +IPTG)	Plac::6hisorf121-tnpA (-IPTG)	1.89715	1.59856	2.19574	1.15463e-14	****
orf1216his::PLtetO-1-Plac::tnpA6his (-aTc, -IPTG)	Plac::6hisorf121-tnpA (-IPTG)	1.12492	0.826328	1.42351	1.24345e-14	****
orf1216his::PLtetO-1-Plac::tnpA6his (+aTc, -IPTG)	Plac::6hisorf121-tnpA (-IPTG)	0.907333	0.608741	1.20592	1.2379e-13	****
orf1216his::PLtetO-1-Plac::tnpA6his (-aTc, +IPTG)	Plac::6hisorf121-tnpA (-IPTG)	2.93277	2.63418	3.23136	1.15463e-14	****
orf1216his::PLtetO-1-Plac::tnpA6his (+aTc, +IPTG)	Plac::6hisorf121-tnpA (-IPTG)	1.90083	1.60224	2.19943	1.15463e-14	****
orf121::PLtetO-1-Plac::tnpA (-aTc, -IPTG)	Plac::6hisorf121-tnpA (+IPTG)	1.79573	1.49714	2.09432	1.15463e-14	****
orf121::PLtetO-1-Plac::tnpA (+aTc, -IPTG)	Plac::6hisorf121-tnpA (+IPTG)	1.42449	1.1259	1.72308	1.15463e-14	****
orf121::PLtetO-1-Plac::tnpA (-aTc, +IPTG)	Plac::6hisorf121-tnpA (+IPTG)	3.44414	3.14555	3.74273	1.15463e-14	****
orf121::PLtetO-1-Plac::tnpA (+aTc, +IPTG)	Plac::6hisorf121-tnpA (+IPTG)	2.51873	2.22014	2.81732	1.15463e-14	****
orf1216his::PLtetO-1-Plac::tnpA6his (-aTc, -IPTG)	Plac::6hisorf121-tnpA (+IPTG)	1.7465	1.44791	2.04509	1.15463e-14	****
orf1216his::PLtetO-1-Plac::tnpA6his (+aTc, -IPTG)	Plac::6hisorf121-tnpA (+IPTG)	1.52891	1.23032	1.8275	1.15463e-14	****
orf1216his::PLtetO-1-Plac::tnpA6his (-aTc, +IPTG)	Plac::6hisorf121-tnpA (+IPTG)	3.55435	3.25576	3.85294	1.15463e-14	****
orf1216his::PLtetO-1-Plac::tnpA6his (+aTc, +IPTG)	Plac::6hisorf121-tnpA (+IPTG)	2.52241	2.22382	2.82101	1.15463e-14	****
orf121::PLtetO-1-Plac::tnpA (+aTc, -IPTG)	orf121::PLtetO-1-Plac::tnpA (-aTc, -IPTG)	-0.371241	-0.669833	-0.0726492	0.00270596	**
orf121::PLtetO-1-Plac::tnpA (-aTc, +IPTG)	orf121::PLtetO-1-Plac::tnpA (-aTc, -IPTG)	1.64841	1.34982	1.947	1.15463e-14	****
orf121::PLtetO-1-Plac::tnpA (+aTc, +IPTG)	orf121::PLtetO-1-Plac::tnpA (-aTc, -IPTG)	0.723004	0.424412	1.0216	8.09119e-12	****
orf1216his::PLtetO-1-Plac::tnpA6his (-aTc, -IPTG)	orf121::PLtetO-1-Plac::tnpA (-aTc, -IPTG)	-0.0492291	-0.347821	0.249363	1	ns
orf1216his::PLtetO-1-Plac::tnpA6his (+aTc, -IPTG)	orf121::PLtetO-1-Plac::tnpA (-aTc, -IPTG)	-0.266816	-0.565408	0.0317756	0.139533	ns
orf1216his::PLtetO-1-Plac::tnpA6his (-aTc, +IPTG)	orf121::PLtetO-1-Plac::tnpA (-aTc, -IPTG)	1.75862	1.46003	2.05722	1.15463e-14	****
orf1216his::PLtetO-1-Plac::tnpA6his (+aTc, +IPTG)	orf121::PLtetO-1-Plac::tnpA (-aTc, -IPTG)	0.726686	0.428094	1.02528	6.47382e-12	****
orf121::PLtetO-1-Plac::tnpA (-aTc, +IPTG)	orf121::PLtetO-1-Plac::tnpA (+aTc, -IPTG)	2.01965	1.72106	2.31824	1.15463e-14	****
orf121::PLtetO-1-Plac::tnpA (+aTc, +IPTG)	orf121::PLtetO-1-Plac::tnpA (+aTc, -IPTG)	1.09424	0.795653	1.39284	1.37668e-14	****
orf1216his::PLtetO-1-Plac::tnpA6his (-aTc, -IPTG)	orf121::PLtetO-1-Plac::tnpA (+aTc, -IPTG)	0.322012	0.02342	0.620604	0.021104	*
orf1216his::PLtetO-1-Plac::tnpA6his (+aTc, -IPTG)	orf121::PLtetO-1-Plac::tnpA (+aTc, -IPTG)	0.104425	-0.194167	0.403017	0.998585	ns
orf1216his::PLtetO-1-Plac::tnpA6his (-aTc, +IPTG)	orf121::PLtetO-1-Plac::tnpA (+aTc, -IPTG)	2.12986	1.83127	2.42846	1.15463e-14	****
orf1216his::PLtetO-1-Plac::tnpA6his (+aTc, +IPTG)	orf121::PLtetO-1-Plac::tnpA (+aTc, -IPTG)	1.09793	0.799335	1.39652	1.35447e-14	****
orf121::PLtetO-1-Plac::tnpA (+aTc, +IPTG)	orf121::PLtetO-1-Plac::tnpA (-aTc, +IPTG)	-0.925408	-1.224	-0.626816	1.03695e-13	****
orf1216his::PLtetO-1-Plac::tnpA6his (-aTc, -IPTG)	orf121::PLtetO-1-Plac::tnpA (-aTc, +IPTG)	-1.69764	-1.99623	-1.39905	1.15463e-14	****
orf1216his::PLtetO-1-Plac::tnpA6his (+aTc, -IPTG)	orf121::PLtetO-1-Plac::tnpA (-aTc, +IPTG)	-1.91523	-2.21382	-1.61664	1.15463e-14	****
orf1216his::PLtetO-1-Plac::tnpA6his (-aTc, +IPTG)	orf121::PLtetO-1-Plac::tnpA (-aTc, +IPTG)	0.110212	-0.18838	0.408804	0.997312	ns
orf1216his::PLtetO-1-Plac::tnpA6his (+aTc, +IPTG)	orf121::PLtetO-1-Plac::tnpA (-aTc, +IPTG)	-0.921726	-1.22032	-0.623134	1.02585e-13	****
orf1216his::PLtetO-1-Plac::tnpA6his (-aTc, -IPTG)	orf121::PLtetO-1-Plac::tnpA (+aTc, +IPTG)	-0.772233	-1.07082	-0.473641	5.57776e-13	****
orf1216his::PLtetO-1-Plac::tnpA6his (+aTc, -IPTG)	orf121::PLtetO-1-Plac::tnpA (+aTc, +IPTG)	-0.98982	-1.28841	-0.691228	4.57412e-14	****
orf1216his::PLtetO-1-Plac::tnpA6his (-aTc, +IPTG)	orf121::PLtetO-1-Plac::tnpA (+aTc, +IPTG)	1.03562	0.737028	1.33421	2.37588e-14	****
orf1216his::PLtetO-1-Plac::tnpA6his (+aTc, +IPTG)	orf121::PLtetO-1-Plac::tnpA (+aTc, +IPTG)	0.0036819	-0.29491	0.302274	1	ns
orf1216his::PLtetO-1-Plac::tnpA6his (+aTc, -IPTG)	orf1216his::PLtetO-1-Plac::tnpA6his (-aTc, -IPTG)	-0.217587	-0.516179	0.0810047	0.459266	ns
orf1216his::PLtetO-1-Plac::tnpA6his (-aTc, +IPTG)	orf1216his::PLtetO-1-Plac::tnpA6his (-aTc, -IPTG)	1.80785	1.50926	2.10644	1.15463e-14	****
orf1216his::PLtetO-1-Plac::tnpA6his (+aTc, +IPTG)	orf1216his::PLtetO-1-Plac::tnpA6his (-aTc, -IPTG)	0.775915	0.477323	1.07451	4.75286e-13	****
orf1216his::PLtetO-1-Plac::tnpA6his (-aTc, +IPTG)	orf1216his::PLtetO-1-Plac::tnpA6his (+aTc, -IPTG)	2.02544	1.72685	2.32403	1.15463e-14	****
orf1216his::PLtetO-1-Plac::tnpA6his (+aTc, +IPTG)	orf1216his::PLtetO-1-Plac::tnpA6his (+aTc, -IPTG)	0.993502	0.69491	1.29209	4.30767e-14	****
orf1216his::PLtetO-1-Plac::tnpA6his (+aTc, +IPTG)	orf1216his::PLtetO-1-Plac::tnpA6his (-aTc, +IPTG)	-1.03194	-1.33053	-0.733346	2.43139e-14	****

## Sheet: Fig 5d
Anova test:
Df	Sum Sq	Mean Sq	F Value	Pr(>F)	star
15	77.47	5.164	1186	<2e-16	***
48	0.21	0.004
Signif. codes: 0 ‘***’ 0.001 ‘**’ 0.01 ‘*’ 0.05 ‘.’ 0.1 ‘ ’ 1
Tukey test:
group1		group2		diff	lwr	upr	p	star
expression plasmid	DNA junction	expression plasmid	DNA junction
Plac::tnpA (+IPTG)	pSW23T	Plac::tnpA (-IPTG)	pSW23T	-0.00392191	-0.172489	0.164645	1	ns
Plac::orf121-tnpA (-IPTG)	pSW23T	Plac::tnpA (-IPTG)	pSW23T	-0.00583086	-0.174398	0.162736	1	ns
Plac::orf121-tnpA (+IPTG)	pSW23T	Plac::tnpA (-IPTG)	pSW23T	0.00728312	-0.161284	0.17585	1	ns
Plac (-IPTG)	ter91-ori91	Plac::tnpA (-IPTG)	pSW23T	-0.0479035	-0.21647	0.120663	0.999541	ns
Plac (+IPTG)	ter91-ori91	Plac::tnpA (-IPTG)	pSW23T	-0.0509116	-0.219478	0.117655	0.999078	ns
Plac::tnpA (-IPTG)	ter91-ori91	Plac::tnpA (-IPTG)	pSW23T	-0.0181843	-0.186751	0.150382	1	ns
Plac::tnpA (+IPTG)	ter91-ori91	Plac::tnpA (-IPTG)	pSW23T	-0.0721291	-0.240696	0.0964376	0.970413	ns
Plac::orf121-tnpA (-IPTG)	ter91-ori91	Plac::tnpA (-IPTG)	pSW23T	-0.0350364	-0.203603	0.13353	0.999991	ns
Plac::orf121-tnpA (+IPTG)	ter91-ori91	Plac::tnpA (-IPTG)	pSW23T	-0.0407472	-0.209314	0.12782	0.999935	ns
Plac (-IPTG)	ori91-ter91	Plac::tnpA (-IPTG)	pSW23T	-0.0439367	-0.212503	0.12463	0.999835	ns
Plac (+IPTG)	ori91-ter91	Plac::tnpA (-IPTG)	pSW23T	-0.0458915	-0.214458	0.122675	0.999723	ns
Plac::tnpA (-IPTG)	ori91-ter91	Plac::tnpA (-IPTG)	pSW23T	2.09372	1.92515	2.26229	0	****
Plac::tnpA (+IPTG)	ori91-ter91	Plac::tnpA (-IPTG)	pSW23T	4.0322	3.86363	4.20077	0	****
Plac::orf121-tnpA (-IPTG)	ori91-ter91	Plac::tnpA (-IPTG)	pSW23T	1.34901	1.18044	1.51757	0	****
Plac::orf121-tnpA (+IPTG)	ori91-ter91	Plac::tnpA (-IPTG)	pSW23T	-0.0567363	-0.225303	0.11183	0.997	ns
Plac::orf121-tnpA (-IPTG)	pSW23T	Plac::tnpA (+IPTG)	pSW23T	-0.00190895	-0.170476	0.166658	1	ns
Plac::orf121-tnpA (+IPTG)	pSW23T	Plac::tnpA (+IPTG)	pSW23T	0.011205	-0.157362	0.179772	1	ns
Plac (-IPTG)	ter91-ori91	Plac::tnpA (+IPTG)	pSW23T	-0.0439816	-0.212548	0.124585	0.999833	ns
Plac (+IPTG)	ter91-ori91	Plac::tnpA (+IPTG)	pSW23T	-0.0469897	-0.215556	0.121577	0.999633	ns
Plac::tnpA (-IPTG)	ter91-ori91	Plac::tnpA (+IPTG)	pSW23T	-0.0142624	-0.182829	0.154304	1	ns
Plac::tnpA (+IPTG)	ter91-ori91	Plac::tnpA (+IPTG)	pSW23T	-0.0682072	-0.236774	0.10036	0.981843	ns
Plac::orf121-tnpA (-IPTG)	ter91-ori91	Plac::tnpA (+IPTG)	pSW23T	-0.0311145	-0.199681	0.137452	0.999998	ns
Plac::orf121-tnpA (+IPTG)	ter91-ori91	Plac::tnpA (+IPTG)	pSW23T	-0.0368253	-0.205392	0.131741	0.999982	ns
Plac (-IPTG)	ori91-ter91	Plac::tnpA (+IPTG)	pSW23T	-0.0400147	-0.208581	0.128552	0.999948	ns
Plac (+IPTG)	ori91-ter91	Plac::tnpA (+IPTG)	pSW23T	-0.0419696	-0.210536	0.126597	0.999906	ns
Plac::tnpA (-IPTG)	ori91-ter91	Plac::tnpA (+IPTG)	pSW23T	2.09764	1.92907	2.26621	0	****
Plac::tnpA (+IPTG)	ori91-ter91	Plac::tnpA (+IPTG)	pSW23T	4.03612	3.86755	4.20469	0	****
Plac::orf121-tnpA (-IPTG)	ori91-ter91	Plac::tnpA (+IPTG)	pSW23T	1.35293	1.18436	1.52149	0	****
Plac::orf121-tnpA (+IPTG)	ori91-ter91	Plac::tnpA (+IPTG)	pSW23T	-0.0528144	-0.221381	0.115752	0.998612	ns
Plac::orf121-tnpA (+IPTG)	pSW23T	Plac::orf121-tnpA (-IPTG)	pSW23T	0.013114	-0.155453	0.181681	1	ns
Plac (-IPTG)	ter91-ori91	Plac::orf121-tnpA (-IPTG)	pSW23T	-0.0420726	-0.210639	0.126494	0.999903	ns
Plac (+IPTG)	ter91-ori91	Plac::orf121-tnpA (-IPTG)	pSW23T	-0.0450808	-0.213647	0.123486	0.999776	ns
Plac::tnpA (-IPTG)	ter91-ori91	Plac::orf121-tnpA (-IPTG)	pSW23T	-0.0123535	-0.18092	0.156213	1	ns
Plac::tnpA (+IPTG)	ter91-ori91	Plac::orf121-tnpA (-IPTG)	pSW23T	-0.0662982	-0.234865	0.102269	0.985985	ns
Plac::orf121-tnpA (-IPTG)	ter91-ori91	Plac::orf121-tnpA (-IPTG)	pSW23T	-0.0292055	-0.197772	0.139361	0.999999	ns
Plac::orf121-tnpA (+IPTG)	ter91-ori91	Plac::orf121-tnpA (-IPTG)	pSW23T	-0.0349163	-0.203483	0.13365	0.999991	ns
Plac (-IPTG)	ori91-ter91	Plac::orf121-tnpA (-IPTG)	pSW23T	-0.0381058	-0.206672	0.130461	0.999972	ns
Plac (+IPTG)	ori91-ter91	Plac::orf121-tnpA (-IPTG)	pSW23T	-0.0400607	-0.208627	0.128506	0.999947	ns
Plac::tnpA (-IPTG)	ori91-ter91	Plac::orf121-tnpA (-IPTG)	pSW23T	2.09955	1.93098	2.26812	0	****
Plac::tnpA (+IPTG)	ori91-ter91	Plac::orf121-tnpA (-IPTG)	pSW23T	4.03803	3.86946	4.2066	0	****
Plac::orf121-tnpA (-IPTG)	ori91-ter91	Plac::orf121-tnpA (-IPTG)	pSW23T	1.35484	1.18627	1.5234	0	****
Plac::orf121-tnpA (+IPTG)	ori91-ter91	Plac::orf121-tnpA (-IPTG)	pSW23T	-0.0509055	-0.219472	0.117661	0.999079	ns
Plac (-IPTG)	ter91-ori91	Plac::orf121-tnpA (+IPTG)	pSW23T	-0.0551866	-0.223753	0.11338	0.997764	ns
Plac (+IPTG)	ter91-ori91	Plac::orf121-tnpA (+IPTG)	pSW23T	-0.0581947	-0.226761	0.110372	0.996092	ns
Plac::tnpA (-IPTG)	ter91-ori91	Plac::orf121-tnpA (+IPTG)	pSW23T	-0.0254674	-0.194034	0.143099	1	ns
Plac::tnpA (+IPTG)	ter91-ori91	Plac::orf121-tnpA (+IPTG)	pSW23T	-0.0794122	-0.247979	0.0891545	0.936151	ns
Plac::orf121-tnpA (-IPTG)	ter91-ori91	Plac::orf121-tnpA (+IPTG)	pSW23T	-0.0423195	-0.210886	0.126247	0.999896	ns
Plac::orf121-tnpA (+IPTG)	ter91-ori91	Plac::orf121-tnpA (+IPTG)	pSW23T	-0.0480303	-0.216597	0.120536	0.999526	ns
Plac (-IPTG)	ori91-ter91	Plac::orf121-tnpA (+IPTG)	pSW23T	-0.0512198	-0.219786	0.117347	0.999013	ns
Plac (+IPTG)	ori91-ter91	Plac::orf121-tnpA (+IPTG)	pSW23T	-0.0531747	-0.221741	0.115392	0.998505	ns
Plac::tnpA (-IPTG)	ori91-ter91	Plac::orf121-tnpA (+IPTG)	pSW23T	2.08644	1.91787	2.255	0	****
Plac::tnpA (+IPTG)	ori91-ter91	Plac::orf121-tnpA (+IPTG)	pSW23T	4.02492	3.85635	4.19348	0	****
Plac::orf121-tnpA (-IPTG)	ori91-ter91	Plac::orf121-tnpA (+IPTG)	pSW23T	1.34172	1.17316	1.51029	0	****
Plac::orf121-tnpA (+IPTG)	ori91-ter91	Plac::orf121-tnpA (+IPTG)	pSW23T	-0.0640195	-0.232586	0.104547	0.989912	ns
Plac (+IPTG)	ter91-ori91	Plac (-IPTG)	ter91-ori91	-0.00300812	-0.171575	0.165559	1	ns
Plac::tnpA (-IPTG)	ter91-ori91	Plac (-IPTG)	ter91-ori91	0.0297192	-0.138848	0.198286	0.999999	ns
Plac::tnpA (+IPTG)	ter91-ori91	Plac (-IPTG)	ter91-ori91	-0.0242256	-0.192792	0.144341	1	ns
Plac::orf121-tnpA (-IPTG)	ter91-ori91	Plac (-IPTG)	ter91-ori91	0.0128671	-0.1557	0.181434	1	ns
Plac::orf121-tnpA (+IPTG)	ter91-ori91	Plac (-IPTG)	ter91-ori91	0.00715633	-0.16141	0.175723	1	ns
Plac (-IPTG)	ori91-ter91	Plac (-IPTG)	ter91-ori91	0.00396684	-0.1646	0.172534	1	ns
Plac (+IPTG)	ori91-ter91	Plac (-IPTG)	ter91-ori91	0.00201195	-0.166555	0.170579	1	ns
Plac::tnpA (-IPTG)	ori91-ter91	Plac (-IPTG)	ter91-ori91	2.14162	1.97306	2.31019	0	****
Plac::tnpA (+IPTG)	ori91-ter91	Plac (-IPTG)	ter91-ori91	4.0801	3.91154	4.24867	0	****
Plac::orf121-tnpA (-IPTG)	ori91-ter91	Plac (-IPTG)	ter91-ori91	1.39691	1.22834	1.56548	0	****
Plac::orf121-tnpA (+IPTG)	ori91-ter91	Plac (-IPTG)	ter91-ori91	-0.00883285	-0.1774	0.159734	1	ns
Plac::tnpA (-IPTG)	ter91-ori91	Plac (+IPTG)	ter91-ori91	0.0327273	-0.135839	0.201294	0.999996	ns
Plac::tnpA (+IPTG)	ter91-ori91	Plac (+IPTG)	ter91-ori91	-0.0212174	-0.189784	0.147349	1	ns
Plac::orf121-tnpA (-IPTG)	ter91-ori91	Plac (+IPTG)	ter91-ori91	0.0158752	-0.152691	0.184442	1	ns
Plac::orf121-tnpA (+IPTG)	ter91-ori91	Plac (+IPTG)	ter91-ori91	0.0101645	-0.158402	0.178731	1	ns
Plac (-IPTG)	ori91-ter91	Plac (+IPTG)	ter91-ori91	0.00697496	-0.161592	0.175542	1	ns
Plac (+IPTG)	ori91-ter91	Plac (+IPTG)	ter91-ori91	0.00502007	-0.163547	0.173587	1	ns
Plac::tnpA (-IPTG)	ori91-ter91	Plac (+IPTG)	ter91-ori91	2.14463	1.97606	2.3132	0	****
Plac::tnpA (+IPTG)	ori91-ter91	Plac (+IPTG)	ter91-ori91	4.08311	3.91454	4.25168	0	****
Plac::orf121-tnpA (-IPTG)	ori91-ter91	Plac (+IPTG)	ter91-ori91	1.39992	1.23135	1.56848	0	****
Plac::orf121-tnpA (+IPTG)	ori91-ter91	Plac (+IPTG)	ter91-ori91	-0.00582473	-0.174391	0.162742	1	ns
Plac::tnpA (+IPTG)	ter91-ori91	Plac::tnpA (-IPTG)	ter91-ori91	-0.0539447	-0.222511	0.114622	0.998251	ns
Plac::orf121-tnpA (-IPTG)	ter91-ori91	Plac::tnpA (-IPTG)	ter91-ori91	-0.0168521	-0.185419	0.151715	1	ns
Plac::orf121-tnpA (+IPTG)	ter91-ori91	Plac::tnpA (-IPTG)	ter91-ori91	-0.0225628	-0.19113	0.146004	1	ns
Plac (-IPTG)	ori91-ter91	Plac::tnpA (-IPTG)	ter91-ori91	-0.0257523	-0.194319	0.142814	1	ns
Plac (+IPTG)	ori91-ter91	Plac::tnpA (-IPTG)	ter91-ori91	-0.0277072	-0.196274	0.140859	1	ns
Plac::tnpA (-IPTG)	ori91-ter91	Plac::tnpA (-IPTG)	ter91-ori91	2.1119	1.94334	2.28047	0	****
Plac::tnpA (+IPTG)	ori91-ter91	Plac::tnpA (-IPTG)	ter91-ori91	4.05038	3.88182	4.21895	0	****
Plac::orf121-tnpA (-IPTG)	ori91-ter91	Plac::tnpA (-IPTG)	ter91-ori91	1.36719	1.19862	1.53576	0	****
Plac::orf121-tnpA (+IPTG)	ori91-ter91	Plac::tnpA (-IPTG)	ter91-ori91	-0.038552	-0.207119	0.130015	0.999968	ns
Plac::orf121-tnpA (-IPTG)	ter91-ori91	Plac::tnpA (+IPTG)	ter91-ori91	0.0370927	-0.131474	0.205659	0.99998	ns
Plac::orf121-tnpA (+IPTG)	ter91-ori91	Plac::tnpA (+IPTG)	ter91-ori91	0.0313819	-0.137185	0.199949	0.999998	ns
Plac (-IPTG)	ori91-ter91	Plac::tnpA (+IPTG)	ter91-ori91	0.0281924	-0.140374	0.196759	0.999999	ns
Plac (+IPTG)	ori91-ter91	Plac::tnpA (+IPTG)	ter91-ori91	0.0262375	-0.142329	0.194804	1	ns
Plac::tnpA (-IPTG)	ori91-ter91	Plac::tnpA (+IPTG)	ter91-ori91	2.16585	1.99728	2.33441	0	****
Plac::tnpA (+IPTG)	ori91-ter91	Plac::tnpA (+IPTG)	ter91-ori91	4.10433	3.93576	4.27289	0	****
Plac::orf121-tnpA (-IPTG)	ori91-ter91	Plac::tnpA (+IPTG)	ter91-ori91	1.42114	1.25257	1.5897	0	****
Plac::orf121-tnpA (+IPTG)	ori91-ter91	Plac::tnpA (+IPTG)	ter91-ori91	0.0153927	-0.153174	0.183959	1	ns
Plac::orf121-tnpA (+IPTG)	ter91-ori91	Plac::orf121-tnpA (-IPTG)	ter91-ori91	-0.00571077	-0.174277	0.162856	1	ns
Plac (-IPTG)	ori91-ter91	Plac::orf121-tnpA (-IPTG)	ter91-ori91	-0.00890026	-0.177467	0.159666	1	ns
Plac (+IPTG)	ori91-ter91	Plac::orf121-tnpA (-IPTG)	ter91-ori91	-0.0108551	-0.179422	0.157712	1	ns
Plac::tnpA (-IPTG)	ori91-ter91	Plac::orf121-tnpA (-IPTG)	ter91-ori91	2.12876	1.96019	2.29732	0	****
Plac::tnpA (+IPTG)	ori91-ter91	Plac::orf121-tnpA (-IPTG)	ter91-ori91	4.06724	3.89867	4.2358	0	****
Plac::orf121-tnpA (-IPTG)	ori91-ter91	Plac::orf121-tnpA (-IPTG)	ter91-ori91	1.38404	1.21548	1.55261	0	****
Plac::orf121-tnpA (+IPTG)	ori91-ter91	Plac::orf121-tnpA (-IPTG)	ter91-ori91	-0.0216999	-0.190267	0.146867	1	ns
Plac (-IPTG)	ori91-ter91	Plac::orf121-tnpA (+IPTG)	ter91-ori91	-0.00318949	-0.171756	0.165377	1	ns
Plac (+IPTG)	ori91-ter91	Plac::orf121-tnpA (+IPTG)	ter91-ori91	-0.00514438	-0.173711	0.163422	1	ns
Plac::tnpA (-IPTG)	ori91-ter91	Plac::orf121-tnpA (+IPTG)	ter91-ori91	2.13447	1.9659	2.30303	0	****
Plac::tnpA (+IPTG)	ori91-ter91	Plac::orf121-tnpA (+IPTG)	ter91-ori91	4.07295	3.90438	4.24151	0	****
Plac::orf121-tnpA (-IPTG)	ori91-ter91	Plac::orf121-tnpA (+IPTG)	ter91-ori91	1.38975	1.22119	1.55832	0	****
Plac::orf121-tnpA (+IPTG)	ori91-ter91	Plac::orf121-tnpA (+IPTG)	ter91-ori91	-0.0159892	-0.184556	0.152578	1	ns
Plac (+IPTG)	ori91-ter91	Plac (-IPTG)	ori91-ter91	-0.00195489	-0.170522	0.166612	1	ns
Plac::tnpA (-IPTG)	ori91-ter91	Plac (-IPTG)	ori91-ter91	2.13766	1.96909	2.30622	0	****
Plac::tnpA (+IPTG)	ori91-ter91	Plac (-IPTG)	ori91-ter91	4.07614	3.90757	4.2447	0	****
Plac::orf121-tnpA (-IPTG)	ori91-ter91	Plac (-IPTG)	ori91-ter91	1.39294	1.22438	1.56151	0	****
Plac::orf121-tnpA (+IPTG)	ori91-ter91	Plac (-IPTG)	ori91-ter91	-0.0127997	-0.181366	0.155767	1	ns
Plac::tnpA (-IPTG)	ori91-ter91	Plac (+IPTG)	ori91-ter91	2.13961	1.97104	2.30818	0	****
Plac::tnpA (+IPTG)	ori91-ter91	Plac (+IPTG)	ori91-ter91	4.07809	3.90952	4.24666	0	****
Plac::orf121-tnpA (-IPTG)	ori91-ter91	Plac (+IPTG)	ori91-ter91	1.3949	1.22633	1.56346	0	****
Plac::orf121-tnpA (+IPTG)	ori91-ter91	Plac (+IPTG)	ori91-ter91	-0.0108448	-0.179412	0.157722	1	ns
Plac::tnpA (+IPTG)	ori91-ter91	Plac::tnpA (-IPTG)	ori91-ter91	1.93848	1.76991	2.10705	0	****
Plac::orf121-tnpA (-IPTG)	ori91-ter91	Plac::tnpA (-IPTG)	ori91-ter91	-0.744713	-0.91328	-0.576146	0	****
Plac::orf121-tnpA (+IPTG)	ori91-ter91	Plac::tnpA (-IPTG)	ori91-ter91	-2.15046	-2.31902	-1.98189	0	****
Plac::orf121-tnpA (-IPTG)	ori91-ter91	Plac::tnpA (+IPTG)	ori91-ter91	-2.68319	-2.85176	-2.51463	0	****
Plac::orf121-tnpA (+IPTG)	ori91-ter91	Plac::tnpA (+IPTG)	ori91-ter91	-4.08894	-4.2575	-3.92037	0	****
Plac::orf121-tnpA (+IPTG)	ori91-ter91	Plac::orf121-tnpA (-IPTG)	ori91-ter91	-1.40574	-1.57431	-1.23718	0	****

## Sheet: Fig 5e
Anova test:
Df	Sum Sq	Mean Sq	F Value	Pr(>F)	star
11	76.67	6.97	2213	<2e-16	***
36	0.11	0.003
Signif. codes: 0 ‘***’ 0.001 ‘**’ 0.01 ‘*’ 0.05 ‘.’ 0.1 ‘ ’ 1
Tukey test:
group1		group2		diff	lwr	upr	p	star
expression plasmid	DNA junction	expression plasmid	DNA junction
orf121::PLtetO-1-Plac::tnpA (+aTc, -IPTG)	pSW23T	orf121::PLtetO-1-Plac::tnpA (-aTc, -IPTG)	pSW23T	0.0016369	-0.136857	0.140131	1	ns
orf121::PLtetO-1-Plac::tnpA (-aTc, +IPTG)	pSW23T	orf121::PLtetO-1-Plac::tnpA (-aTc, -IPTG)	pSW23T	0.0176775	-0.120817	0.156172	0.999999	ns
orf121::PLtetO-1-Plac::tnpA (+aTc, +IPTG)	pSW23T	orf121::PLtetO-1-Plac::tnpA (-aTc, -IPTG)	pSW23T	0.0045761	-0.133918	0.14307	1	ns
orf121::PLtetO-1-Plac::tnpA (-aTc, -IPTG)	ter91-ori91	orf121::PLtetO-1-Plac::tnpA (-aTc, -IPTG)	pSW23T	0.0178244	-0.12067	0.156319	0.999999	ns
orf121::PLtetO-1-Plac::tnpA (+aTc, -IPTG)	ter91-ori91	orf121::PLtetO-1-Plac::tnpA (-aTc, -IPTG)	pSW23T	0.0210428	-0.117451	0.159537	0.999992	ns
orf121::PLtetO-1-Plac::tnpA (-aTc, +IPTG)	ter91-ori91	orf121::PLtetO-1-Plac::tnpA (-aTc, -IPTG)	pSW23T	0.0124931	-0.126001	0.150987	1	ns
orf121::PLtetO-1-Plac::tnpA (+aTc, +IPTG)	ter91-ori91	orf121::PLtetO-1-Plac::tnpA (-aTc, -IPTG)	pSW23T	0.0328395	-0.105655	0.171334	0.999398	ns
orf121::PLtetO-1-Plac::tnpA (-aTc, -IPTG)	ori91-ter91	orf121::PLtetO-1-Plac::tnpA (-aTc, -IPTG)	pSW23T	2.02806	1.88957	2.16655	0	****
orf121::PLtetO-1-Plac::tnpA (+aTc, -IPTG)	ori91-ter91	orf121::PLtetO-1-Plac::tnpA (-aTc, -IPTG)	pSW23T	1.14288	1.00439	1.28138	0	****
orf121::PLtetO-1-Plac::tnpA (-aTc, +IPTG)	ori91-ter91	orf121::PLtetO-1-Plac::tnpA (-aTc, -IPTG)	pSW23T	3.57414	3.43564	3.71263	0	****
orf121::PLtetO-1-Plac::tnpA (+aTc, +IPTG)	ori91-ter91	orf121::PLtetO-1-Plac::tnpA (-aTc, -IPTG)	pSW23T	3.01407	2.87558	3.15257	0	****
orf121::PLtetO-1-Plac::tnpA (-aTc, +IPTG)	pSW23T	orf121::PLtetO-1-Plac::tnpA (+aTc, -IPTG)	pSW23T	0.0160406	-0.122454	0.154535	1	ns
orf121::PLtetO-1-Plac::tnpA (+aTc, +IPTG)	pSW23T	orf121::PLtetO-1-Plac::tnpA (+aTc, -IPTG)	pSW23T	0.00293919	-0.135555	0.141433	1	ns
orf121::PLtetO-1-Plac::tnpA (-aTc, -IPTG)	ter91-ori91	orf121::PLtetO-1-Plac::tnpA (+aTc, -IPTG)	pSW23T	0.0161875	-0.122307	0.154682	1	ns
orf121::PLtetO-1-Plac::tnpA (+aTc, -IPTG)	ter91-ori91	orf121::PLtetO-1-Plac::tnpA (+aTc, -IPTG)	pSW23T	0.0194059	-0.119088	0.1579	0.999997	ns
orf121::PLtetO-1-Plac::tnpA (-aTc, +IPTG)	ter91-ori91	orf121::PLtetO-1-Plac::tnpA (+aTc, -IPTG)	pSW23T	0.0108562	-0.127638	0.14935	1	ns
orf121::PLtetO-1-Plac::tnpA (+aTc, +IPTG)	ter91-ori91	orf121::PLtetO-1-Plac::tnpA (+aTc, -IPTG)	pSW23T	0.0312026	-0.107292	0.169697	0.999626	ns
orf121::PLtetO-1-Plac::tnpA (-aTc, -IPTG)	ori91-ter91	orf121::PLtetO-1-Plac::tnpA (+aTc, -IPTG)	pSW23T	2.02642	1.88793	2.16492	0	****
orf121::PLtetO-1-Plac::tnpA (+aTc, -IPTG)	ori91-ter91	orf121::PLtetO-1-Plac::tnpA (+aTc, -IPTG)	pSW23T	1.14125	1.00275	1.27974	0	****
orf121::PLtetO-1-Plac::tnpA (-aTc, +IPTG)	ori91-ter91	orf121::PLtetO-1-Plac::tnpA (+aTc, -IPTG)	pSW23T	3.5725	3.434	3.71099	0	****
orf121::PLtetO-1-Plac::tnpA (+aTc, +IPTG)	ori91-ter91	orf121::PLtetO-1-Plac::tnpA (+aTc, -IPTG)	pSW23T	3.01243	2.87394	3.15093	0	****
orf121::PLtetO-1-Plac::tnpA (+aTc, +IPTG)	pSW23T	orf121::PLtetO-1-Plac::tnpA (-aTc, +IPTG)	pSW23T	-0.0131014	-0.151596	0.125393	1	ns
orf121::PLtetO-1-Plac::tnpA (-aTc, -IPTG)	ter91-ori91	orf121::PLtetO-1-Plac::tnpA (-aTc, +IPTG)	pSW23T	0.000146919	-0.138347	0.138641	1	ns
orf121::PLtetO-1-Plac::tnpA (+aTc, -IPTG)	ter91-ori91	orf121::PLtetO-1-Plac::tnpA (-aTc, +IPTG)	pSW23T	0.00336529	-0.135129	0.141859	1	ns
orf121::PLtetO-1-Plac::tnpA (-aTc, +IPTG)	ter91-ori91	orf121::PLtetO-1-Plac::tnpA (-aTc, +IPTG)	pSW23T	-0.00518443	-0.143679	0.13331	1	ns
orf121::PLtetO-1-Plac::tnpA (+aTc, +IPTG)	ter91-ori91	orf121::PLtetO-1-Plac::tnpA (-aTc, +IPTG)	pSW23T	0.015162	-0.123332	0.153656	1	ns
orf121::PLtetO-1-Plac::tnpA (-aTc, -IPTG)	ori91-ter91	orf121::PLtetO-1-Plac::tnpA (-aTc, +IPTG)	pSW23T	2.01038	1.87189	2.14888	0	****
orf121::PLtetO-1-Plac::tnpA (+aTc, -IPTG)	ori91-ter91	orf121::PLtetO-1-Plac::tnpA (-aTc, +IPTG)	pSW23T	1.1252	0.98671	1.2637	0	****
orf121::PLtetO-1-Plac::tnpA (-aTc, +IPTG)	ori91-ter91	orf121::PLtetO-1-Plac::tnpA (-aTc, +IPTG)	pSW23T	3.55646	3.41796	3.69495	0	****
orf121::PLtetO-1-Plac::tnpA (+aTc, +IPTG)	ori91-ter91	orf121::PLtetO-1-Plac::tnpA (-aTc, +IPTG)	pSW23T	2.99639	2.8579	3.13489	0	****
orf121::PLtetO-1-Plac::tnpA (-aTc, -IPTG)	ter91-ori91	orf121::PLtetO-1-Plac::tnpA (+aTc, +IPTG)	pSW23T	0.0132483	-0.125246	0.151742	1	ns
orf121::PLtetO-1-Plac::tnpA (+aTc, -IPTG)	ter91-ori91	orf121::PLtetO-1-Plac::tnpA (+aTc, +IPTG)	pSW23T	0.0164667	-0.122027	0.154961	0.999999	ns
orf121::PLtetO-1-Plac::tnpA (-aTc, +IPTG)	ter91-ori91	orf121::PLtetO-1-Plac::tnpA (+aTc, +IPTG)	pSW23T	0.00791698	-0.130577	0.146411	1	ns
orf121::PLtetO-1-Plac::tnpA (+aTc, +IPTG)	ter91-ori91	orf121::PLtetO-1-Plac::tnpA (+aTc, +IPTG)	pSW23T	0.0282634	-0.110231	0.166758	0.999855	ns
orf121::PLtetO-1-Plac::tnpA (-aTc, -IPTG)	ori91-ter91	orf121::PLtetO-1-Plac::tnpA (+aTc, +IPTG)	pSW23T	2.02348	1.88499	2.16198	0	****
orf121::PLtetO-1-Plac::tnpA (+aTc, -IPTG)	ori91-ter91	orf121::PLtetO-1-Plac::tnpA (+aTc, +IPTG)	pSW23T	1.13831	0.999812	1.2768	0	****
orf121::PLtetO-1-Plac::tnpA (-aTc, +IPTG)	ori91-ter91	orf121::PLtetO-1-Plac::tnpA (+aTc, +IPTG)	pSW23T	3.56956	3.43107	3.70805	0	****
orf121::PLtetO-1-Plac::tnpA (+aTc, +IPTG)	ori91-ter91	orf121::PLtetO-1-Plac::tnpA (+aTc, +IPTG)	pSW23T	3.0095	2.871	3.14799	0	****
orf121::PLtetO-1-Plac::tnpA (+aTc, -IPTG)	ter91-ori91	orf121::PLtetO-1-Plac::tnpA (-aTc, -IPTG)	ter91-ori91	0.00321837	-0.135276	0.141713	1	ns
orf121::PLtetO-1-Plac::tnpA (-aTc, +IPTG)	ter91-ori91	orf121::PLtetO-1-Plac::tnpA (-aTc, -IPTG)	ter91-ori91	-0.00533135	-0.143825	0.133163	1	ns
orf121::PLtetO-1-Plac::tnpA (+aTc, +IPTG)	ter91-ori91	orf121::PLtetO-1-Plac::tnpA (-aTc, -IPTG)	ter91-ori91	0.0150151	-0.123479	0.153509	1	ns
orf121::PLtetO-1-Plac::tnpA (-aTc, -IPTG)	ori91-ter91	orf121::PLtetO-1-Plac::tnpA (-aTc, -IPTG)	ter91-ori91	2.01024	1.87174	2.14873	0	****
orf121::PLtetO-1-Plac::tnpA (+aTc, -IPTG)	ori91-ter91	orf121::PLtetO-1-Plac::tnpA (-aTc, -IPTG)	ter91-ori91	1.12506	0.986563	1.26355	0	****
orf121::PLtetO-1-Plac::tnpA (-aTc, +IPTG)	ori91-ter91	orf121::PLtetO-1-Plac::tnpA (-aTc, -IPTG)	ter91-ori91	3.55631	3.41782	3.69481	0	****
orf121::PLtetO-1-Plac::tnpA (+aTc, +IPTG)	ori91-ter91	orf121::PLtetO-1-Plac::tnpA (-aTc, -IPTG)	ter91-ori91	2.99625	2.85775	3.13474	0	****
orf121::PLtetO-1-Plac::tnpA (-aTc, +IPTG)	ter91-ori91	orf121::PLtetO-1-Plac::tnpA (+aTc, -IPTG)	ter91-ori91	-0.00854972	-0.147044	0.129944	1	ns
orf121::PLtetO-1-Plac::tnpA (+aTc, +IPTG)	ter91-ori91	orf121::PLtetO-1-Plac::tnpA (+aTc, -IPTG)	ter91-ori91	0.0117967	-0.126697	0.150291	1	ns
orf121::PLtetO-1-Plac::tnpA (-aTc, -IPTG)	ori91-ter91	orf121::PLtetO-1-Plac::tnpA (+aTc, -IPTG)	ter91-ori91	2.00702	1.86852	2.14551	0	****
orf121::PLtetO-1-Plac::tnpA (+aTc, -IPTG)	ori91-ter91	orf121::PLtetO-1-Plac::tnpA (+aTc, -IPTG)	ter91-ori91	1.12184	0.983345	1.26033	0	****
orf121::PLtetO-1-Plac::tnpA (-aTc, +IPTG)	ori91-ter91	orf121::PLtetO-1-Plac::tnpA (+aTc, -IPTG)	ter91-ori91	3.55309	3.4146	3.69159	0	****
orf121::PLtetO-1-Plac::tnpA (+aTc, +IPTG)	ori91-ter91	orf121::PLtetO-1-Plac::tnpA (+aTc, -IPTG)	ter91-ori91	2.99303	2.85453	3.13152	0	****
orf121::PLtetO-1-Plac::tnpA (+aTc, +IPTG)	ter91-ori91	orf121::PLtetO-1-Plac::tnpA (-aTc, +IPTG)	ter91-ori91	0.0203464	-0.118148	0.158841	0.999995	ns
orf121::PLtetO-1-Plac::tnpA (-aTc, -IPTG)	ori91-ter91	orf121::PLtetO-1-Plac::tnpA (-aTc, +IPTG)	ter91-ori91	2.01557	1.87707	2.15406	0	****
orf121::PLtetO-1-Plac::tnpA (+aTc, -IPTG)	ori91-ter91	orf121::PLtetO-1-Plac::tnpA (-aTc, +IPTG)	ter91-ori91	1.13039	0.991895	1.26888	0	****
orf121::PLtetO-1-Plac::tnpA (-aTc, +IPTG)	ori91-ter91	orf121::PLtetO-1-Plac::tnpA (-aTc, +IPTG)	ter91-ori91	3.56164	3.42315	3.70014	0	****
orf121::PLtetO-1-Plac::tnpA (+aTc, +IPTG)	ori91-ter91	orf121::PLtetO-1-Plac::tnpA (-aTc, +IPTG)	ter91-ori91	3.00158	2.86308	3.14007	0	****
orf121::PLtetO-1-Plac::tnpA (-aTc, -IPTG)	ori91-ter91	orf121::PLtetO-1-Plac::tnpA (+aTc, +IPTG)	ter91-ori91	1.99522	1.85673	2.13371	0	****
orf121::PLtetO-1-Plac::tnpA (+aTc, -IPTG)	ori91-ter91	orf121::PLtetO-1-Plac::tnpA (+aTc, +IPTG)	ter91-ori91	1.11004	0.971548	1.24854	0	****
orf121::PLtetO-1-Plac::tnpA (-aTc, +IPTG)	ori91-ter91	orf121::PLtetO-1-Plac::tnpA (+aTc, +IPTG)	ter91-ori91	3.5413	3.4028	3.67979	0	****
orf121::PLtetO-1-Plac::tnpA (+aTc, +IPTG)	ori91-ter91	orf121::PLtetO-1-Plac::tnpA (+aTc, +IPTG)	ter91-ori91	2.98123	2.84274	3.11973	0	****
orf121::PLtetO-1-Plac::tnpA (+aTc, -IPTG)	ori91-ter91	orf121::PLtetO-1-Plac::tnpA (-aTc, -IPTG)	ori91-ter91	-0.885178	-1.02367	-0.746684	0	****
orf121::PLtetO-1-Plac::tnpA (-aTc, +IPTG)	ori91-ter91	orf121::PLtetO-1-Plac::tnpA (-aTc, -IPTG)	ori91-ter91	1.54608	1.40758	1.68457	0	****
orf121::PLtetO-1-Plac::tnpA (+aTc, +IPTG)	ori91-ter91	orf121::PLtetO-1-Plac::tnpA (-aTc, -IPTG)	ori91-ter91	0.986011	0.847517	1.12451	0	****
orf121::PLtetO-1-Plac::tnpA (-aTc, +IPTG)	ori91-ter91	orf121::PLtetO-1-Plac::tnpA (+aTc, -IPTG)	ori91-ter91	2.43125	2.29276	2.56975	0	****
orf121::PLtetO-1-Plac::tnpA (+aTc, +IPTG)	ori91-ter91	orf121::PLtetO-1-Plac::tnpA (+aTc, -IPTG)	ori91-ter91	1.87119	1.7327	2.00968	0	****
orf121::PLtetO-1-Plac::tnpA (+aTc, +IPTG)	ori91-ter91	orf121::PLtetO-1-Plac::tnpA (-aTc, +IPTG)	ori91-ter91	-0.560065	-0.698559	-0.421571	0	****
